1 **Controlling Selectivity of Modular Microbial Biosynthesis of Butyryl-CoA-**  
2 **Derived Designer Esters**

3

4 Jong-Won Lee<sup>1,2</sup> and Cong T. Trinh<sup>1,2,3,§</sup>

5

6 <sup>1</sup>Bredesen Center for Interdisciplinary Research and Graduate Education, University of Tennessee,  
7 Knoxville, TN, USA

8 <sup>2</sup>Center for Bioenergy Innovation, Oak Ridge National Laboratory, Oak Ridge, TN, USA

9 <sup>3</sup>Department of Chemical and Biomolecular Engineering, University of Tennessee, Knoxville, TN,  
10 USA

11

12 <sup>§</sup>Corresponding author. Email: [ctrinh@utk.edu](mailto:ctrinh@utk.edu)

13

## 14 **Abstract**

15 Short-chain esters have broad utility as flavors, fragrances, solvents, and biofuels. Controlling  
16 selectivity of ester microbial biosynthesis has been an outstanding metabolic engineering problem.  
17 Here, we present a generalizable framework to enable the *de novo* fermentative microbial  
18 biosynthesis of butyryl-CoA-derived designer esters (e.g., butyl acetate, ethyl butyrate, butyl  
19 butyrate) with controllable selectivity. Using the modular design principles, we generated the  
20 butyryl-CoA-derived ester pathways as exchangeable production modules compatible with an  
21 engineered chassis cell for anaerobic production of designer esters. We designed these modules  
22 derived from an acyl-CoA submodule (e.g., acetyl-CoA, butyryl-CoA), an alcohol submodule  
23 (e.g., ethanol, butanol), a cofactor regeneration submodule (e.g., NADH), and an alcohol  
24 acetyltransferase (AAT) submodule (e.g., ATF1, SAAT) for rapid module construction and  
25 optimization by manipulating replication (e.g., plasmid copy number), transcription (e.g.,  
26 promoters), translation (e.g., codon optimization), pathway enzymes, and pathway induction  
27 conditions. To further enhance production of designer esters with high selectivity, we  
28 systematically screened various strategies of protein solubilization using protein fusion tags and  
29 chaperones to improve the soluble expression of multiple pathway enzymes. Finally, our  
30 engineered ester-producing strains could achieve 19-fold increase in butyl acetate production (0.64  
31 g/L, 96% selectivity), 6-fold increase in ethyl butyrate production (0.41 g/L, 86% selectivity), and  
32 13-fold increase in butyl butyrate production (0.45 g/L, 54% selectivity) as compared to the initial  
33 strains. Overall, this study presented a generalizable framework to engineer modular microbial  
34 platforms for anaerobic production of butyryl-CoA-derived designer esters from renewable  
35 feedstocks.

36

37 **Keywords:** Esters; butyl acetate; ethyl butyrate; butyl butyrate; alcohol acyltransferase; AAT;  
38 ATF1; SAAT; modular design; modular cell; modular pathway design; codon optimization; fusion  
39 partners; chaperones; soluble expression; enzyme solubilization; *Escherichia coli*.

## 40 **Introduction**

41 Esters are industrial platform chemicals with versatile applications as flavors, fragrances, solvents,  
42 and biofuels (Lee and Trinh, 2020). Microbial biosynthesis of esters from lignocellulosic biomass  
43 can potentially offer an alternative promising solution to the current petroleum-based process that  
44 is neither renewable nor sustainable (Chubukov et al., 2016; Seo et al., 2019). For bioenergy  
45 applications, short-chain (C6-C10) esters have recently been attracting attention as drop-in fuels  
46 due to its favorable properties such as high energy density (Layton and Trinh, 2016b), high  
47 hydrophobicity (Tai et al., 2015), and good compatibility with current infrastructures including  
48 engines, transport, and storage density (Contino et al., 2013a; Jenkins et al., 2013). For instance,  
49 ethyl valerate (C7) (Contino et al., 2013b), butyl butyrate (C8) (Chuck and Donnelly, 2014;  
50 Jenkins et al., 2013), butyl valerate (C9) (Contino et al., 2013a), and pentyl valerate (C10) (Contino  
51 et al., 2013a) are good fuel additives for gasolines while butyl butyrate (C8) (Chuck and Donnelly,  
52 2014; Jenkins et al., 2013) and ethyl octanoate (C10) (Chuck and Donnelly, 2014) are considered  
53 as an alternative jet fuel.

54 In nature, eukaryotic cells utilize alcohol acetyltransferases (AATs) to condense an alcohol  
55 and acetyl-CoA to make acetate esters in a thermodynamically favorable reaction, as often found  
56 in plants and fruits for generating scents (D'Auria, 2006) or in fermenting yeasts for making flavors  
57 (van Wyk et al., 2018). Inspired by nature, microbial biomanufacturing platforms (e.g.,  
58 *Escherichia coli*) have been engineered to make these acetate esters directly from fermentable  
59 sugars (Chacon et al., 2019; Horton and Bennett, 2006; Horton et al., 2003; Layton and Trinh,  
60 2014; Layton and Trinh, 2016a; Lee and Trinh, 2019; Rodriguez et al., 2014; Vadali et al., 2004).  
61 Remarkably, the substrate promiscuity of AATs also enables microbial biosynthesis of acylate  
62 esters beyond acetate esters including propionate esters (Layton and Trinh, 2016a), lactate esters

63 (Lee and Trinh, 2019; Seo et al., 2021), butyrate esters (Layton and Trinh, 2014), pentanoate esters  
64 (Layton and Trinh, 2016a), and hexanoate esters (Layton and Trinh, 2016a). Therefore, harnessing  
65 diversity of AATs, acyl-CoAs, and alcohols can result in the *de novo* microbial biosynthesis of a  
66 vast library of esters from renewable feedstocks for useful applications.

67 To enable a systematic and rapid generation of microbial biocatalysts to produce various  
68 esters, a modular cell engineering framework has recently been developed (Garcia and Trinh,  
69 2019a; Garcia and Trinh, 2019b; Garcia and Trinh, 2020; Trinh et al., 2015; Wilbanks et al., 2018).  
70 Each ester production strain can be assembled from an engineered modular chassis cell and  
71 exchangeable ester producing pathways known as production modules. Nevertheless,  
72 experimental implementation has been challenging due to the intrinsic complexity of the  
73 production modules requiring expression of multiple heterologous enzymes derived from bacteria,  
74 yeasts, and plants (Layton and Trinh, 2014; Layton and Trinh, 2016a; Layton and Trinh, 2016b;  
75 Lee and Trinh, 2019).

76 Critical to the effective microbial biosynthesis of a target designer ester is the availability  
77 of efficient and robust AATs and precursor metabolite pathways that are compatible with a  
78 microbial host (Seo et al., 2021). Selective microbial biosynthesis of acylate esters other than  
79 acetate esters is very challenging due to low availability of target acyl-CoAs and alcohols, a high  
80 intracellular pool of competing substrates (i.e., non-target acetyl-CoA and alcohols), and  
81 inefficient AATs. For instance, the microbial ester production is much less efficient for a butyryl-  
82 CoA-derived acylate ester (e.g., butyl butyrate (Feng et al., 2021; Layton and Trinh, 2014)) than  
83 for an acetate ester (e.g., isobutyl acetate (Tai et al., 2015; Tashiro et al., 2015), isoamyl acetate  
84 (Tai et al., 2015)), due to low product selectivity. In particular, equipped with a butyrate ester  
85 pathway, an engineered *E. coli* can generate two acyl-CoAs (i.e., acetyl-CoA, butyryl-CoA) and

86 two alcohols (i.e., ethanol, butanol) from fermentable sugars that can be condensed to form two  
87 possible acetate esters (i.e., ethyl acetate (EA), butyl acetate (BA)) and two possible butyrate esters  
88 (i.e., ethyl butyrate (EB), butyl butyrate (BB)). Furthermore, effective microbial production of  
89 acylate esters has been hampered by the required expression of multiple heterologous enzymes  
90 that are not compatible with the host. Specifically, low solubility of eukaryotic AATs in a  
91 microbial host is a commonly observed problem (Tai et al., 2015; Zhu et al., 2015). Currently,  
92 innovative strategies to produce designer esters with high selectivity and efficiency in a microbial  
93 host are very limited.

94 In this study, we presented systematic design and engineering approaches to tackle the  
95 current challenges of microbial biosynthesis of designer esters. As a proof-of-study, we  
96 demonstrated the microbial biosynthesis of designer butyryl-CoA-derived esters (i.e., BA, EB,  
97 BB) with high selectivity in an engineered modular *E. coli* cell. Specifically, we first developed a  
98 combinatorial modular design of the butyryl-CoA-derived ester biosynthesis pathways for rapid  
99 construction and optimization. Next, we optimized the culture conditions for expression of  
100 multiple pathway enzymes including culture temperatures and inducer concentrations to enhance  
101 and balance metabolic fluxes toward the synthesis of the target esters. To further improve the  
102 compatibility of the engineered pathways with the modular cell, we screened combinatorial  
103 strategies of protein solubilization including codon optimization, the use of fusion tags, and/or co-  
104 expression of chaperones to improve the soluble expression of multiple pathway enzymes (e.g.,  
105 AATs). Finally, we characterized the engineered ester-producing strains under anaerobic  
106 conditions with pH-adjustment to achieve the enhanced production of designer esters with high  
107 selectivity. Overall, this study presents a generalizable framework for engineering modular

108 microbial platforms for anaerobic production of butyryl-CoA-derived designer esters from  
109 renewable biomass feedstocks.

110

## 111 **Results**

112 **Designing a general framework to build exchangeable ester production modules for the *de***

113 ***novo* microbial biosynthesis of designer butyryl-CoA-derived esters.** To generate the *de novo*

114 microbial biosynthesis of butyryl-CoA-derived esters from fermentable sugars in *E. coli* (Fig 1a),

115 three major pathways are required including i) acyl-CoA synthesis pathway (butyryl-CoA, acetyl-

116 CoA), ii) alcohol synthesis pathway (ethanol, butanol), and iii) ester synthesis pathway (AAT).

117 Biosynthesis of acetyl-CoA is endogenous and is essential for cell functions. We modularized

118 these fermentative ester pathways into four submodules for rapid pathway construction and

119 optimization including i) submodule 1 (SM1) carrying *E. coli atoB* (*atoB<sub>Ec</sub>*), *Clostridium*

120 *acetobutylicum Hbd* (*hbd<sub>Ca</sub>*), *C. acetobutylicum crt* (*crt<sub>Ca</sub>*), and *Treponema denticola ter* (*ter<sub>Td</sub>*) for

121 butyryl-CoA synthesis, ii) submodule 2 (SM2) consisted of *Zymomonas mobilis pdc* (*pdc<sub>Zm</sub>*) and

122 *adhB* (*adhB<sub>Zm</sub>*) or *C. acetobutylicum adhE2* (*adhE2<sub>Ca</sub>*) for alcohol synthesis, iii) submodule 3

123 (SM3) carrying *Candida boidinii fdh* (*fdh<sub>Cb</sub>*) for NADH regeneration, and iv) submodule 4 (SM4)

124 carrying *Saccharomyces cerevisiae ATF1* (*ATF1<sub>Sc</sub>*, specific for acetate ester synthesis) or *Fragaria*

125 *x ananassa* (cultivated strawberry) *SAAT* (*SAAT<sub>Fa</sub>*, specific for acylate ester synthesis) for ester

126 synthesis (Fig. 1b). In the design, the parts were chosen based on our previous function validation

127 of the butyryl-CoA and alcohol (ethanol, butanol) pathways (Layton and Trinh, 2014), the

128 substrate specificity of AATs against acetate and acylate esters (Layton and Trinh, 2016a), and the

129 expression of a NAD<sup>+</sup>-dependent formate dehydrogenase (Fdh) for enhanced intracellular NADH

130 availability (Lim et al., 2013; Shen et al., 2011). Each exchangeable ester module can be assembled

131 from two parts: i) plasmid “pCore” carrying SM1, a common pathway for biosynthesis of butyryl-  
132 CoA-derived esters and ii) plasmid “pDerivatization” carrying SM2-SM3-SM4, variable pathways  
133 in butyryl-CoA-derived esters using plasmids with various copy numbers (Fig. 1c, Table S1). Figs.  
134 2a, 3a, and 4a show how each submodule can be assembled to build the biosynthesis pathways of  
135 BA, EB, and BB, respectively with a list of enzymes presented in Table S2. By transforming a  
136 combination of pCore and pDerivatization into the modular *E. coli* strain, TCS083  $\Delta$ *fadE* (DE3)  
137 (Layton and Trinh, 2014), we generated a set of initial strains, EcJWBA1-6, EcJWEB1-6, and  
138 EcJWBB1-6 for optimizing the designer biosynthesis of BA (Fig. 2b), EB (Fig. 3b), and BB (Fig.  
139 3b), respectively (Table 1).

140

141 **Establishing the *de novo* microbial biosynthesis of designer butyryl-CoA-derived esters in**  
142 **initial strains.** Following the construction of initial strains, we characterized them in capped  
143 conical tubes to validate the constructed biosynthesis pathways of butyryl-CoA-derived esters and  
144 to identify the best combination of pCore and pDerivatization. Our results show that these  
145 pathways are functional in the chassis cell as evidenced by the protein expression via SDS-PAGE  
146 analysis (Fig. S1) and production of the target products (Figs. 2c, 3c, and 4c). We found that  
147 EcJWBA2 (Fig. 2c), EcJWEB2 (Fig. 3c), and EcJWBB2 (Fig. 4c) carrying the pCore with low  
148 copy number and the pDerivatization with high copy number achieved the highest ester production  
149 among the six initial strains characterized for each compound, indicating that higher alcohol  
150 production and/or AAT expression are required for efficient ester synthesis. For BA production,  
151 EcJWBA2 produced  $34.2 \pm 6.6$  mg/L of BA with the selectivity of 74.3% (Fig. 2c, Table S4). For  
152 EB production, EcJWEB2 produced  $71.0 \pm 6.6$  mg/L of EB with the selectivity of 92.0% (Fig. 3c,



153 Table S5). For BB production, EcJWBB2 produced  $33.5 \pm 2.9$  mg/L of BB with the selectivity of  
154 20.8% (Fig. 4c, Table S6).

155 After validating the synthetic pathways of butyryl-CoA-derived esters, we next optimized  
156 induction conditions with the best identified ester producers, EcJWBA2, EcJWEB2, and  
157 EcJWBB2. To optimize induction conditions, we tested various induction conditions using a  
158 combination of two different temperatures (28°C and 37°C), and three different concentrations of  
159 the inducer (0.01, 0.1, and 1.0 mM IPTG). The results show that the titer of BA, EB, and BB was  
160 improved by 1.4, 2.8, and 3.8-fold at the optimized induction conditions, respectively (Figs. 2d,  
161 3d, 4d, and S2, Table S7-S9). Specifically, for BA production, EcJWBA2 produced  $48.0 \pm 7.1$   
162 mg/L of BA with the selectivity of 83.1% when it was induced by 0.1 mM of IPTG at 28°C (Figs.  
163 2d, and S2a, Table S7). For EB production, EcJWEB2 produced  $200.4 \pm 9.4$  mg/L of EB with the  
164 selectivity of 89.6% when it was induced by 0.1 mM of IPTG at 28°C (Figs. 3d, and S2b, Table  
165 S8). For BB production, EcJWBB2 produced  $127.4 \pm 32.5$  mg/L of BB with the selectivity of  
166 34.0% when it was induced by 0.1 mM of IPTG at 37°C (Figs. 4c, and S2c, Table S9). Collectively,  
167 we established the *de novo* microbial biosynthesis of butyryl-CoA-derived esters and identified  
168 the induction conditions for enhanced production of these esters to be used in the subsequent  
169 experiments. The ester production and selectivity, however, are relatively low, especially for the  
170 biosynthesis of EB and BB, and hence require further optimization.

171  
172 **Alleviating poor AAT expression as a rate limiting step for ester microbial biosynthesis**  
173 **through a comprehensive evaluation of various protein solubilization strategies.** Since the  
174 protein bands of ATF1<sub>Sc</sub> and SAAT<sub>Fa</sub> are weaker than the other protein bands (Figs. S1, and S3)  
175 and these eukaryotic AATs are prone to poor expression in *E. coli* (Tai et al., 2015), we

176 hypothesized that the AAT flux is one of the rate limiting steps and hence improving soluble  
177 expression of AATs would enhance the ester production. To examine the effect of AAT  
178 solubilization on ester production, we chose three strategies including i) codon optimization  
179 (Gorochowski et al., 2015; Rosano and Ceccarelli, 2009); ii) the use of fusion partners such as  
180 maltose binding protein (MBP) (Waugh, 2016), N-utilization substrate A (NusA) (Raran-Kurussi  
181 and Waugh, 2014), or thioredoxin 1 (TrxA) (Lavallie et al., 1993); and iii) co-expression of  
182 molecular chaperones (DnaK/DnaJ/GrpE, GroES/GroEL, or Trigger factor (Tf)) (Thomson et al.,  
183 2013) (Fig. 5a).

184 To test whether AAT is a rate limiting step in isolation, we engineered the chassis cell  
185 harboring only the acyl-CoA and AAT submodules while alcohols can be externally doped. We  
186 started by generating the plasmids that harbor wildtype AATs, codon optimized AATs, fusion  
187 partner tagged AATs. For BA production, the plasmids carrying wildtype *ATF1<sub>Sc</sub>*, codon  
188 optimized *ATF1<sub>Sc</sub>* (*ATF1<sub>Sc</sub><sup>opt</sup>*), and N'-terminus MBP-, NusA-, or TrxA-tagged *ATF1<sub>Sc</sub>*  
189 (*malE\_ATF1<sub>Sc</sub>*, *nusA\_ATF1<sub>Sc</sub>*, or *trxA\_ATF1<sub>Sc</sub>*) were constructed and introduced into TCS083  
190  $\Delta$ *fadE* (DE3) (Layton and Trinh, 2014), resulting EcJWATF1, EcJWATF1<sup>opt</sup>, EcJWATF1<sup>MBP</sup>,  
191 EcJWATF1<sup>NusA</sup>, EcJWATF1<sup>TrxA</sup>, respectively (Table 1). For EB and BB production, the plasmids  
192 carrying wildtype SAAT (*SAAT<sub>Fa</sub>*), codon optimize SAAT<sub>Fa</sub> (*SAAT<sub>Fa</sub><sup>opt</sup>*), and N'-terminus MBP-,  
193 NusA-, or TrxA-tagged SAAT<sub>Fa</sub> (*malE\_SAAT<sub>Fa</sub>*; *nusA\_SAAT<sub>Fa</sub>*; or *trxA\_SAAT<sub>Fa</sub>*) were constructed  
194 and introduced into TCS083  $\Delta$ *fadE* (DE3) (Layton and Trinh, 2014) with the pACYCDuet-1  
195 carrying the SM1 (butyryl-CoA pathway), resulting EcJWSAAT, EcJWSAAT<sup>opt</sup>, EcJWSAAT<sup>MBP</sup>,  
196 EcJWSAAT<sup>NusA</sup>, EcJWSAAT<sup>TrxA</sup>, respectively (Table 1). To co-express chaperones with AATs,  
197 the chaperone plasmid set comprising of five different plasmids carrying various chaperones were

198 introduced into EcJWATF1 and EcJWSAAT, resulting in EcJWATF1<sup>Chp1</sup>~EcJWATF1<sup>Chp5</sup> and  
199 EcJWSAAT<sup>Chp1</sup>~EcJWSAAT<sup>Chp5</sup>, respectively (Table 1).

200 We next characterized the engineered strains in conical tubes with 2 g/L of alcohol doping  
201 including ethanol and butanol to evaluate the conversion of an alcohol (ethanol/butanol) into an  
202 ester (EA/BA) by ATF1<sub>Sc</sub> (Fig.5b) or EB/BB by SAAT<sub>Fa</sub> (Fig. 5e), respectively. The cultures were  
203 induced by 0.1 mM of IPTG, 0.5 mg/ml of L-arabinose (if applicable) and/or 5 ng/ml of  
204 tetracycline (if applicable), and the protein expressions were confirmed by SDS-PAGE analysis  
205 (Fig. S4). The characterization results show that the protein solubilization strategies enhanced the  
206 conversion of an alcohol into an ester (Fig. 5c-d, and 5f-g). Interestingly, we found that different  
207 protein solubilization strategies worked effectively for different AATs. In particular, the codon  
208 optimization and use of a fusion partner (i.e., MBP, NusA, or TrxA) for ATF1<sub>Sc</sub> improved the BA  
209 conversion while co-expression of chaperones (i.e., GroES/EL, GroES/EL/Tf, or  
210 DnaK/DnaJ/GrpE/GroES/EL) with SAAT<sub>Fa</sub> enhanced the EB/BB conversion.

211 For BA conversion, EcJWATF1<sup>opt</sup>, EcJWATF1<sup>MBP</sup>, EcJWATF1<sup>NusA</sup>, EcJWATF1<sup>TrxA</sup>  
212 achieved 85.9%, 74.6%, 79.5%, and 86.6% of BA conversion, resulting in 7.1, 6.2, 6.6, and 7.2-  
213 fold improvement as compared to EcJWATF1 (12.0%), respectively (Fig. 5d, and Table S10).  
214 With 2 g/L butanol doping, the BA production could reach up to  $2.26 \pm 0.22$  g/L, and the selectivity  
215 of BA over other esters was as high as 98.1%. As compared to BA production under similar  
216 characterization conditions, improvement in EB production was less prominent, only reaching up  
217 to  $0.46 \pm 0.09$  g/L with a selectivity of 86.3%. In particular, EcJWSAAT<sup>Chp2</sup>, EcJWSAAT<sup>Chp3</sup>, and  
218 EcJWSAAT<sup>Chp5</sup> achieved 2.6%, 1.5%, and 2.0% of EB conversion, leading to 8.5, 4.7, and 6.4-  
219 fold improvement as compared to EcJWSAAT (0.3%), respectively (Fig. 5f, and Table S11). The  
220 metabolic burden in protein expressions and different catalytic efficiency between SAAT<sub>Fa</sub> and

221  $ATF1_{Sc}$  likely contributed to the differences in strain performance. For BB conversion, the BB  
222 production was reasonably high, reaching up to  $1.71 \pm 0.26$  g/L with a selectivity of 79.2%. In  
223 particular,  $EcJWSAAT^{Chp2}$ ,  $EcJWSAAT^{Chp3}$ , and  $EcJWSAAT^{Chp5}$  achieved 36.8%, 19.1%, and  
224 11.9% of BB conversion, resulting in 9.0, 4.7, and 2.9-fold improvement as compared to  
225  $EcJWSAAT$  (4.1%), respectively (Fig. 5g, and Table S11). Even though  $ATF1_{Sc}$  and  $SAAT_{Fa}$  have  
226 specificity towards longer-chain alcohols and acyl-CoAs, respectively, we also observed  
227 production of EA as a minor byproduct. For the EA conversion,  $EcJWATF1^{opt}$ ,  $EcJWATF1^{MBP}$ ,  
228  $EcJWATF1^{NusA}$ ,  $EcJWATF1^{TrxA}$  achieved 2.3%, 1.0%, 1.3%, and 1.3% of EA conversion,  
229 resulting in 20.5, 9.0, 11.7, and 11.8-fold improvement as compared to  $EcJWATF1$  (0.1%),  
230 respectively (Fig. 5c, and Table S10).

231 Overall, our results clearly indicated that AAT solubilization plays a critical role in  
232 controlling ester production and selectivity by isolated investigation of the AAT submodule with  
233 alcohol doping experiments. The next step is to evaluate the effect of most solubilized AATs on  
234 the *de novo* microbial biosynthesis of designer esters directly from fermentable sugars.

235  
236 **Enhancing AAT solubility improves the endogenous production of BA and EB but not BB.**

237 To evaluate whether the AAT solubilization improves the *de novo* ester microbial biosynthesis  
238 from glucose, we constructed and characterized various BA, EB, and BB-producing strains. For  
239 BA production, we first built four pRSFDuet-1 plasmids carrying  $SM2(adhE2_{Ca})$ - $SM3(fdh^{opt})$ -  
240  $SM4(ATF1_{Sc}^{opt}, male\_ATF1_{Sc}^{opt}, nusA\_ATF1_{Sc}^{opt}, or trxA\_ATF1_{Sc}^{opt})$ , respectively (Table S1), and  
241 then introduced them into the chassis cell TCS083  $\Delta fadE$  (DE3) with the pACYCDuet-1 plasmid  
242 carrying the SM1 (butyryl-CoA pathway) to generate  $EcJWBA7$ ~ $EcJWBA10$ , respectively (Table  
243 1). For EB/BB production, we additionally introduced the plasmid carrying *groES* and *groEL* into

244 EcJWEB2 and EcJWBB2, resulting in EcJWEB7 and EcJWBB7, respectively (Table 1). We  
245 characterized the engineered ester production strains in conical tubes for the endogenous ester  
246 production from glucose. For the expression of chaperones in EcJWEB2 and EcJWBB2, we also  
247 tested three different concentrations of L-arabinose as an inducer.

248 The characterization results show that the ATF1<sub>sc</sub> solubilization indeed enhanced the  
249 endogenous BA production. Specifically, EcJWBA7~EcJWBA10 produced  $51.7 \pm 7.1$  mg/L,  $79.3$   
250  $\pm 9.8$  mg/L,  $76.1 \pm 6.2$  mg/L, and  $89.5 \pm 14.8$  mg/L of BA, resulting in 1.1, 1.7, 1.6, and 1.9-fold  
251 improved BA production as compared to the EcJWBA2 ( $48.0 \pm 7.1$  mg/L), respectively (Fig. 2d,  
252 and Table S12). Notably, because EcJWBA8~10 expressing ATF1<sub>sc</sub><sup>opt</sup> with N'-terminus fusion  
253 partner such as MBP, NusA, and TrxA achieved higher BA production than that of EcJWBA7  
254 expressing ATF1<sub>sc</sub><sup>opt</sup> alone, we could confirm that there is a synergistic effect between codon  
255 optimization and the use of a fusion partner in BA production with ATF1<sub>sc</sub>.

256 Similarly, we also observed the improvement in the endogenous EB production. When the  
257 cell cultures were induced by 0 mg/ml, 0.1 mg/ml, 0.5 mg/ml and 5.0 mg/ml of L-arabinose,  
258 respectively, EcJWEB7 produced  $263.9 \pm 51.8$  mg/L,  $337.6 \pm 46.1$  mg/L,  $365.7 \pm 69.2$  mg/L, and  
259  $346.2 \pm 59.8$  mg/L of EB, resulting in 1.3, 1.7, 1.8, and 1.7-fold improved EB production as  
260 compared to EcJWEB2 ( $200.4 \pm 9.4$  mg/L) (Fig. 3d, and Table S13). However, unlike the EB  
261 production, chaperone expression negatively affected the endogenous BB production. When the  
262 cultures were induced by 0 mg/ml, 0.1 mg/ml, 0.5 mg/ml and 5.0 mg/ml of L-arabinose,  
263 respectively, EcJWBB7 produced  $25.6 \pm 10.7$  mg/L,  $30.0 \pm 4.8$  mg/L,  $51.4 \pm 3.4$  mg/L, and  $42.1$   
264  $\pm 4.1$  mg/L of BB, achieving 0.2, 0.2, 0.4, and 0.3-fold decreased BB production as compared to  
265 EcJWBB2 ( $127.4 \pm 32.5$  mg/L) (Fig. 4d, and Table S14). Overall, the AAT solubilization is critical  
266 for the *de novo* microbial biosynthesis of designer esters. However, the limitation of other

267 enzymatic steps besides the AAT condensation might interfere with the ester biosynthesis due to  
268 the complexity of the engineered pathways.

269

270 **Co-solubilization of AdhE2<sub>Ca</sub> and AAT improved the endogenous production of BA and BB.**

271 Due to the low residual butanol in our BA/BB production experiments, we hypothesized that the  
272 low availability of butanol, one of the intermediates for butyl esters synthesis (Table S4-S14),  
273 might have affected the endogenous production of BB and EB. The bi-functional aldehyde/alcohol  
274 dehydrogenase AdhE2<sub>Ca</sub> is known for its critical role in butanol production, and its low solubility  
275 can significantly reduce *in vivo* activities as compared to the *in vitro* activities (Shen et al., 2011).  
276 We tested whether the co-solubilization of AdhE2<sub>Ca</sub> and AAT improved the *de novo* microbial  
277 biosynthesis of BA/BB by alleviating the limitation of butanol.

278 For BA production, we first constructed four pRSFDuet-1 plasmids carrying  
279 SM2(*adhE2*<sub>Ca</sub><sup>opt</sup>, *malE\_adhE2*<sub>Ca</sub><sup>opt</sup>, *nusA\_adhE2*<sub>Ca</sub><sup>opt</sup>, or *trxA\_adhE2*<sub>Ca</sub><sup>opt</sup>)-SM3(*fdh*<sup>opt</sup>)-  
280 SM4(*trxA\_ATF1*<sub>Sc</sub><sup>opt</sup>), respectively (Table S1) and introduced them into the chassis cell TCS083  
281  $\Delta$ *fadE* (DE3) with the pACYCDuet-1 plasmid carrying the SM1 (butyryl-CoA pathway) to  
282 generate EcJWBA11~EcJWBA14, respectively (Table 1). Next, we characterized these strains in  
283 conical tubes for BA production. The expression of the pathway enzymes was confirmed by SDS-  
284 PAGE analysis (Fig. S5). The results show EcJWBA11~EcJWBA14 produced 80.3 ± 9.0 mg/L,  
285 54.2 ± 4.9 mg/L, 82.8 ± 15.5 mg/L, and 203.0 ± 5.7 mg/L of BA, respectively (Fig. 2d, Table S15).  
286 Remarkably, EcJWBA14 achieved 2.3-fold improved BA production (203.0 ± 5.7 mg/L) as  
287 compared to EcJWBA10 (89.5 ± 14.8 mg/L), indicating that solubilization of pathway enzymes  
288 using a fusion partner can be a simple, but useful extendable pathway optimization strategy in  
289 metabolic engineering.

290 To strengthen this result, we also evaluated whether the use of TrxA fusion partner with  
291 AdhE2<sub>Ca</sub><sup>opt</sup> can improve BB production. We built the pRSFDuet-1 plasmid carrying  
292 SM2(*trxA\_adhE2<sub>Ca</sub><sup>opt</sup>*)-SM3(*fdh<sup>opt</sup>*)-SM4(SAAT<sub>Fa</sub>) (Table S1) and introduced it into the chassis  
293 cell TCS083  $\Delta$ *fadE* (DE3) with the pACYCDuet-1 plasmid carrying the SM1 (butyryl-CoA  
294 pathway) to generate EcJWBB8 (Table 1). By characterizing EcJWBB8 in conical tubes, the  
295 results, indeed, show that EcJWBB8 achieved 1.3-fold improved BB production ( $167.3 \pm 18.2$   
296 mg/L) as compared to EcJWBB2 ( $127.4 \pm 32.5$  mg/L) (Fig. 4d, and Table S15). Notably,  
297 EcJWBB8 achieved ~1.5-fold improved BB selectivity (50.6%) as compared to EcJWBB2  
298 (34.0%), resulting in ~1.7-fold improved butanol/ethanol ratio (g/g of butanol to ethanol) (from  
299 0.04 to 0.07) and ~0.6-fold reduced EB production (from  $246.2 \pm 72.6$  mg/L to  $156.3 \pm 22.4$  mg/L)  
300 (Tables S15). This result suggests that there is a substrate competition between ethanol and butanol  
301 in the enzymatic reaction of ATF1<sub>Sc</sub>, which can be alleviated by either engineering AATs with  
302 alcohol substrate preference or tuning the selective alcohol production.

303 Overall, the results highlight the critical limitation of AdhE and AAT enzymatic steps  
304 negatively affects the designer ester biosynthesis due to poor enzyme expression. Combinational  
305 solubilization of multiple pathway enzymes is feasible to alleviate the enzyme expression of a  
306 large, complex metabolic pathway.

307  
308 **Anaerobic conditions helped boost the endogenous production of butyryl-CoA-derived**  
309 **designer esters.** Although BA and BB production were improved to some extent via co-  
310 solubilization of AdhE2<sub>Ca</sub> and AAT, residual butanol titer was still low, remaining at the titers of  
311  $0.18 \pm 0.00$  g/L for EcJWBB8 and  $0.20 \pm 0.01$  g/L for EcJWBA14 (Tables S9, and S15). Given  
312 that the abundant alcohol production is important for ester synthesis due to the high  $K_M$  value of

313 AATs (Lee and Trinh, 2019; Tai et al., 2015), butanol production needs to be further improved for  
314 higher production of butyl esters. Because strict anaerobic conditions are important for alcohol  
315 production (Bond-Watts et al., 2011; Shen et al., 2011), we characterized the final strains,  
316 EcJWBA14, EcJWEB7, and EcJWBB8, in anaerobic bottles with pH-adjustment to evaluate their  
317 performance in production of C4-derived esters. The culture pH was adjusted to around 7 with  
318 10 M NaOH every 24 hours to maintain the optimum growth pH of *E. coli* (Philip et al., 2018).

319 The characterization results of EcJWBA14, EcJWEB7, EcJWBB8 showed 12.9, 5.8, and  
320 13.4-fold improvement in titers, 4.8, 3.7, and 4.6-fold improvement in yields, and 6.5, 1.4, and  
321 3.4-fold improvement in productivity as compared to the initial strains, EcJWBA2, EcJWEB2, and  
322 EcJWBB2, respectively. Specifically, EcJWBA14 produced  $441.4 \pm 40.9$  mg/L of BA (9.2% of  
323 maximum theoretical yield) with 91.7% of selectivity (Figs. 2d, and Table S16), EcJWEB7  
324 produced  $408.9 \pm 44.3$  mg/L of EB (8.5% of maximum theoretical yield) with 85.5% of selectivity  
325 (Figs. 3d, 3f, and Table S16), and EcJWBB8 produced  $449.6 \pm 43.0$  mg/L of BB (10.0% of  
326 maximum theoretical yield) with 53.5% of selectivity (Figs. 4d, 4f, and Table S16). In comparison  
327 with the direct fermentative production of butyryl-CoA-derived esters by *E. coli* in previous  
328 studies (Layton and Trinh, 2014), EcJWBA14 achieved 882.8, 1839.0, and 3937.0-fold improved  
329 TRY (titer, productivity, and yield) in BA production, EcJWEB7 achieved 3.1, 3.1, and 11.0-fold  
330 improved TRY in EB production, and EcJWBB8 achieved 12.2, 12.2, and 44.1-fold improved  
331 TRY in BB production (Table S18).

332

333 **Use of an endogenous *adhE*-deficient chassis further enhanced BA production.** The modular  
334 cell TCS083  $\Delta$ *fadE* (DE3) is designed to be auxotrophic and required to metabolically couple with  
335 a butyryl-CoA-derived ester module (Layton and Trinh, 2014; Trinh et al., 2015). We hypothesized



336 the promiscuity of endogenous alcohol dehydrogenases might have interfered with the butyryl-  
337 CoA-derived ester modules, competing for ester biosynthesis. For instance, the endogenous  
338 bifunctional aldehyde/alcohol dehydrogenase *adhE* favors the formation of ethanol over butanol  
339 (Atsumi et al., 2008). To demonstrate the optimization of BA production, we replaced TCS083  
340  $\Delta$ *fadE* (DE3) with TCS095 (DE3) that is an *adhE*-deficient chassis cell (Wilbanks et al., 2018).  
341 We generated EcJWBA15 by introducing the BA pathway into TCS095 (DE3) (Table 1). The  
342 characterization results of EcJWBA15 in conical tubes showed that EcJWBA15 achieved higher  
343 BA production than EcJWBA14 by 1.28-fold with a titer of  $259.5 \pm 11.6$  mg/L and a selectivity of  
344 94.8 (Fig. 2d and Table S17). Finally, by characterizing EcJWBA15 in anaerobic bottles with pH-  
345 adjustment, we could achieve  $636.3 \pm 44.8$  mg/L of BA (23.0% of maximum theoretical yield)  
346 with a high selectivity (95.7%) (Figs. 2d, 2f, and Table S17).

347

## 348 **Discussion**

349 In this study, we reported the development of a generalizable framework to engineer a modular  
350 microbial platform for anaerobic production of butyryl-CoA-derived esters from fermentable  
351 sugars. Using the modular design approach, each ester production strain can be generated from an  
352 engineered modular (chassis) cell and an exchangeable ester production module in a plug-and-play  
353 fashion. The study focused on engineering exchangeable ester production modules to be  
354 compatible with the chassis cell for efficient biosynthesis of designer esters with controllable  
355 selectivity, including BA, EB, and BB. To build these modules, we arranged a set of 11  
356 heterologous genes, derived from bacteria, yeasts, and plants, into four submodules SM1-SM4 to  
357 facilitate rapid module construction and optimization via manipulation of gene replication,  
358 transcription, translation, post-translation, pathway enzymes, and pathway induction conditions

359 (Fig. S7). Our modular cell engineering approach achieves the highest production of esters (i.e.,  
360 BA, EB, and BB) ever reported in *E. coli* with controllable selectivity.

361 For the past two decades, controlling selectivity of designer esters has been an outstanding  
362 metabolic engineering problem, mainly due to the complexity of the engineered pathways that  
363 require simultaneous expression of multiple heterologous enzymes causing deficient supply of  
364 precursor metabolites (i.e., alcohols and acyl-CoAs) for ester condensation. While the metabolic  
365 pathways directed towards biosynthesis of acetyl-CoA, butyryl-CoA, ethanol, and butanol are well  
366 known and can be tuned by manipulating gene replication (i.e., plasmid copy numbers) and  
367 transcription (e.g., RBSs, promoters) in many native and engineered ethanol/butanol producers  
368 (Nielsen et al., 2009; Shen et al., 2011; Sillers et al., 2008; Trinh et al., 2008; Zhang et al., 1995),  
369 extension of these pathways for ester biosynthesis has been problematic due to poor AAT  
370 expression and specificity. Aiming at these critical issues in this study, our initial combinatorial  
371 strategies to control the selectivity of butyryl-CoA-derived ester biosynthesis are proven to be  
372 effective by using ATF1<sub>sc</sub> specific for acetate ester biosynthesis (e.g., BA) and SAAT<sub>Fa</sub> specific  
373 for butyrate ester biosynthesis (e.g., EB and BB) (Layton and Trinh, 2016a), together with  
374 optimization of the pathway gene replication and transcription for sufficient supply of precursor  
375 metabolites. However, the ester titer and selectivity were still insufficient since the problem of  
376 proper expression of pathway enzymes remained, which is difficult to solve. Based on the Protein-  
377 Sol, a web tool for predicting protein solubility from sequence (Hebditch et al., 2017), AATs are  
378 predicted to have the lowest solubility among the engineered pathway enzymes followed by  
379 AdhE2<sub>Ca</sub> (Fig. S6). The prediction is consistent with the SDS-PAGE analysis as observed in our  
380 study (Fig. S4) and by others (Zhu et al., 2015), explaining the production phenotypes of the  
381 engineered strains (Figs. 2e, 3e, and 4e).

382 In solving the AAT expression problem, we found that implementing a comprehensive  
383 screening of protein solubilization strategies including codon optimization (Gorochowski et al.,  
384 2015; Rosano and Ceccarelli, 2009), the use of fusion tags (Lavallie et al., 1993; Raran-Kurussi  
385 and Waugh, 2014; Waugh, 2016), co-expression of chaperones (Thomson et al., 2013), and/or the  
386 combination thereof is simple and effective. Remarkably, fusion tags improve ATF1<sub>Sc</sub>  
387 solubilization while chaperones enhance expression of SAAT<sub>Fa</sub>, which is intriguing to discover  
388 but is not trivial to predict or explain. In general, we expect that solubilization with fusion tags are  
389 enzyme specific; however, use of chaperones alone can be very unspecific and might not be as  
390 effective, especially when multiple enzymes are expressed simultaneously. Our study highlights  
391 the significance of modulating the translation and post-translation for multiple pathway enzymes,  
392 that cannot be effectively addressed by optimization of gene replication and transcription alone as  
393 commonly practiced in the fields of metabolic engineering and synthetic biology. We  
394 demonstrated the combinatorial protein solubilization strategy can be a powerful tool to improve  
395 microbial production of biochemicals and biofuels with (eukaryotic) aggregate-prone enzymes in  
396 the bacterial chassis cells like *E. coli*.

397 The engineered strains achieved 19-fold in BA production with 96% selectivity, 6-fold in  
398 EB production with 86% selectivity, and 13-fold in BB production with 54% selectivity, as  
399 compared to the initial strains. Unlike the microbial biosynthesis of BA and EB, tuning the BB  
400 selectivity is intrinsically challenging due to the following reasons: i) the butanol biosynthesis is  
401 limiting due to low solubility of AdhE<sub>Ca</sub> and ii) AdhE<sub>Ca</sub> is promiscuous and can reduce both acetyl-  
402 CoA and butyryl-CoA (Shen et al., 2011). While our strategy to enhance co-solubilization of  
403 AdhE<sub>Ca</sub> together with SAAT<sub>Fa</sub> helped improve BB production and selectivity, EB is always  
404 produced as a significant byproduct. Should high selectivity be desirable for specific applications,

405 two engineering strategies can be further exploited to overcome this problem: i) improving  
406 specificity of AdhE<sub>Ca</sub> towards butyryl-CoA and ii) decoupling butanol and butyl butyrate  
407 production using a microbial co-culture system. Furthermore, without external supply of butanol,  
408 production of BA and BB directly from glucose was much lower likely due to metabolic burden  
409 required for expressing multiple pathway enzymes.

410 One distinct advantage of microbial production of esters is that they have low solubility in  
411 an aqueous phase and hence are very beneficial for fermentation. Even though the butyryl-CoA-  
412 derived esters are inhibitory to microbes (Wilbanks and Trinh, 2017), their toxicity is significantly  
413 alleviated by implementing *in situ* fermentation and extraction (Layton and Trinh, 2014)  
414 (Rodriguez et al., 2014; Tai et al., 2015). Besides beneficial detoxification by extraction, we also  
415 found that maintaining anaerobic culture conditions at neutral pH control improves ester  
416 production. Anaerobic production of butyryl-CoA-derived esters from fermentable sugars are  
417 favorable because i) high product yields can be achieved due to higher reduction of esters than  
418 glucose and ii) scale-up for anaerobic processes is much simpler and more economical (Layton  
419 and Trinh, 2014).

420 In conclusion, we developed a generalizable framework to engineer a modular microbial  
421 platform for anaerobic production of butyryl-CoA-derived designer esters. Using the principles of  
422 modular design, we engineered the *de novo* modular fermentative pathways of biosynthesis of BA,  
423 EB, and BB from fermentable sugars in *E. coli* with controllable selectivity. In addition to the  
424 conventional strategies of replication and transcription manipulation, implementing various  
425 protein solubilization strategies on aggregate-prone pathway enzymes to control enzyme (post)-  
426 translation is very crucial to enhance ester production and selectivity. We envision the modular  
427 microbial ester synthesis platform presented is expected to accelerate the biosynthesis of diverse

428 natural esters with various industrial applications.

429

## 430 **Methods**

431 **Strains and plasmids.** The list of strains and plasmids used in this study are presented in Table 1.

432 Briefly, *E. coli* TOP10 strain was used for molecular cloning. Except for EcJWBA15, TCS083

433  $\Delta$ *fadE* (DE3) (Layton and Trinh, 2014) was used as a host strain. For EcJWBA15, TCS095 (DE3)

434 (Wilbanks et al., 2018) was used as a host strain. A set of duet vectors including pACYCDuet-1,

435 pETDuet-1, and pRSFDuet-1 was used as plasmid backbones for constructing a library of BA, EB,

436 and BB production modules. The codon-optimized *S. cerevisiae* *ATF1* (*ATF1*<sub>Sc</sub><sup>opt</sup>), cultivated

437 strawberry (*F. ananassa*) *SAAT* (*SAAT*<sub>Fa</sub><sup>opt</sup>), *Candida boidinii* *fdh* (*fdh*<sub>Cb</sub><sup>opt</sup>), and *C.*

438 *acetobutylicum* *adhE2* (*adhE2*<sub>Ca</sub><sup>opt</sup>) were synthesized by the U.S. Department of Energy (DOE)

439 Joint Genome Institute (JGI). The list of codon optimized gene sequences is presented in Table

440 S3.

441

442 **Culture conditions.** For molecular cloning and seed cultures, lysogeny broth (LB) was used. For

443 ester production, TBD<sub>50</sub> medium, terrific broth (TB) with 50 g/L glucose was used (without

444 supplementation with glycerol). For all cultures, 30 µg/mL chloramphenicol (Cm), 50 µg/mL

445 kanamycin (Kan), and/or 100 µg/mL ampicillin (Amp) were added to the medium where

446 applicable.

447 For seed cultures, 1% (v/v) of stock cells were grown overnight in 5 mL of LB medium

448 with appropriate antibiotics. For ester production in capped conical tubes, seed cultures were

449 prepared as described in seed cultures. About 1% (v/v) of seed cultures were inoculated in 500 mL

450 baffled flasks containing 50 ml of TBD<sub>50</sub> medium with appropriate antibiotics. The cells were

451 aerobically grown in shaking incubators at 28°C or 37°C, 200 rpm and induced at an O.D.<sub>600</sub> of  
452 0.6~0.8 with various concentrations of IPTG, arabinose (if applicable), and/or 5 ng/ml of  
453 tetracycline (if applicable). After 2 hours of induction, the cultures in the baffled flasks were  
454 distributed into 15 mL conical centrifuge tubes (Cat. #339650, Thermo Scientific, MA, USA) with  
455 a working volume of 5 mL. Then, each tube was overlaid with 1 mL hexadecane (20% (v/v)) for  
456 *in situ* ester recovery and capped to generate anaerobic conditions. Finally, the tubes were grown  
457 for another 18 hours on a 75° angled platform in shaking incubators at 28°C or 37°C, 200 rpm. The  
458 remained cultures in the baffled flasks were induced for further 2 hours and then the cells were  
459 harvested for SDS-PAGE analysis.

460 For ester production in strict anaerobic bottles with pH-adjustment, the induced cultures  
461 were prepared as described in ester production in conical tubes with a working volume of 100 mL.  
462 To generate the anaerobic state, the induced cultures were transferred into anaerobic bottles. Then,  
463 each anaerobic bottle was overlaid with 20% (v/v) of hexadecane for *in situ* ester recovery and  
464 sealed with a rubber stopper inside the anaerobic chamber. The headspace of the anaerobic bottles  
465 was vacuumed and replaced by an anaerobic mix of 90% N<sub>2</sub>, 5% H<sub>2</sub>, and 5% CO<sub>2</sub> inside the  
466 anaerobic chamber. Finally, the anaerobic bottles were grown for another 90 hours in shaking  
467 incubators at 28°C or 37°C, 200 rpm. The culture medium and hexadecane overlay samples were  
468 taken through the rubber stopper via a syringe and needle by maintaining the ratio of 5:1. The  
469 culture pH was adjusted to around 7 using 10 M NaOH every 24 hours.

470

471 **Protein expression and SDS-PAGE analysis.** The cells were collected from the culture by  
472 centrifugation and resuspended in 1X PBS (Phosphate Buffered Saline) buffer (pH 7.4) at the final  
473 O.D.<sub>600</sub> of 10. Cell pellets were disrupted using the B-PER complete reagent (Cat. #89822, Thermo

474 Scientific, MA, USA), according to the manufacturer's instruction. Total and soluble fractions  
475 were separated by centrifugation for 20 min at 4°C. The resulting samples were mixed with 6X  
476 SDS (sodium dodecyl sulfate) sample buffer, heated at 95°C for 5 min, and analyzed by SDS-  
477 PAGE (SDS-polyacrylamide gel electrophoresis) using Novex™ 14% Tris-Glycine protein gels  
478 (Cat. #XP00145BOX, Thermo Scientific, MA, USA). Protein bands were visualized with  
479 Coomassie Brilliant Blue staining.

480

481 **Determination of cell concentrations.** The optical density was measured at 600 nm using a  
482 spectrophotometer (GENESYS 30, Thermo Scientific, IL, USA). The dry cell mass was obtained  
483 by multiplication of the optical density of culture broth with a pre-determined conversion factor,  
484 0.48 g/L/O.D.

485

486 **High performance liquid chromatography (HPLC).** Metabolites and doped alcohols were  
487 quantified by using the Shimadzu HPLC system (Shimadzu Inc., MD, USA) equipped with the  
488 Aminex HPX-87H cation exchange column (BioRad Inc., CA, USA) heated at 50°C. A mobile  
489 phase of 10 mN H<sub>2</sub>SO<sub>4</sub> was used at a flow rate of 0.6 mL/min. Detection was made with the  
490 reflective index detector (RID).

491

492 **Gas chromatography coupled with mass spectroscopy (GC/MS).** All esters were quantified by  
493 GC/MS. For GC/MS analysis, the hexadecane overlays were used for quantification of esters. To  
494 prepare samples, the hexadecane overlays were first centrifuged at 4,800 x g for 5 min and diluted  
495 with hexadecane containing internal standard (isoamyl alcohol) in a 1:1 (v/v) ratio. Then, 1 µL of  
496 samples were directly injected into a gas chromatograph (GC) HP 6890 equipped with the mass

497 selective detector (MS) HP 5973 using an autosampler. For the GC system, helium was used as  
498 the carrier gas at a flow rate of 0.5 mL/min and the analytes were separated on a Phenomenex ZB-  
499 5 capillary column (30 m x 0.25 mm x 0.25  $\mu$ m). The temperature of the oven was programmed  
500 from the initial value of 50°C followed by a heating rate of 1°C/min to 58°C and then heated at a  
501 ramp of 25°C/min to 235°C. Finally, the oven is heated to 300°C a ramp of 50°C/min and held for  
502 2 min. The injection was performed using the splitless mode with an initial injector temperature  
503 of 280°C. For the MS system, a selected ion monitoring (SIM) mode was deployed to detect  
504 analytes. The SIM parameters for detecting esters were as follows: i) for ethyl acetate, ions 45.00,  
505 and 61.00 detected from 4.15 to 5.70 min, ii) for isoamyl alcohol (internal standard), ions 45.00,  
506 and 88.00 detected from 5.70 to 7.20 min, iii) for ethyl butyrate, ions 47.00, and 116.00 detected  
507 from 7.20 to 7.75 min, iv) for butyl acetate, ions 61.00, and 116.00 detected from 7.75 to 11.25  
508 min, vi) for butyl butyrate, ions 101.00, and 116.00 detected from 11.25 to 12.50 min.

509

## 510 **Acknowledgments**

511 This research was financially supported in part by the NSF CAREER award (NSF#1553250) and  
512 the DOE subcontract grant (DE-AC05-000R22725) by the Center of Bioenergy Innovation, the  
513 U.S. Department of Energy Bioenergy Research Center funded by the Office of Biological and  
514 Environmental Research in the DOE Office of Science, and the U.S. Department of Energy Joint  
515 Genome Institute. The authors would like to thank the Center of Environmental Biotechnology at  
516 UTK for using the GC/MS instrument.

517

## 518 **Author contributions**



519 CTT conceived and supervised this study. JWL and CTT designed the experiments, analyzed the  
520 data, and drafted the manuscript. JWL performed the experiments. Both authors read and approved  
521 the final manuscript.

522

## 523 **References**

- 524 Atsumi, S., Cann, A. F., Connor, M. R., Shen, C. R., Smith, K. M., Brynildsen, M. P., Chou, K. J.,  
525 Hanai, T., Liao, J. C., 2008. Metabolic engineering of *Escherichia coli* for 1-butanol  
526 production. *Metab Eng.* 10, 305-11.
- 527 Bond-Watts, B. B., Bellerose, R. J., Chang, M. C. Y., 2011. Enzyme mechanism as a kinetic  
528 control element for designing synthetic biofuel pathways. *Nature Chemical Biology.* 7,  
529 222-227.
- 530 Chacon, M. G., Kendrick, E. G., Leak, D. J., 2019. Engineering *Escherichia coli* for the production  
531 of butyl octanoate from endogenous octanoyl-CoA. *Peerj.* 7.
- 532 Chubukov, V., Mukhopadhyay, A., Petzold, C. J., Keasling, J. D., Martin, H. G., 2016. Synthetic  
533 and systems biology for microbial production of commodity chemicals. *Npj Systems  
534 Biology and Applications.* 2.
- 535 Chuck, C. J., Donnelly, J., 2014. The compatibility of potential bioderived fuels with Jet A-1  
536 aviation kerosene. *Applied energy.* 118, 83-91.
- 537 Contino, F., Dagaut, P., Dayma, G., Halter, F., Foucher, F., Mounaïm-Rousselle, C., 2013a.  
538 Combustion and emissions characteristics of valeric biofuels in a compression ignition  
539 engine. *Journal of Energy Engineering.* 140, A4014013.
- 540 Contino, F., Foucher, F., Halter, F., Mounaïm-Rousselle, C., Dayma, G., Dagaut, P., 2013b.  
541 Engine performances and emissions of second-generation biofuels in spark ignition  
542 engines: The case of methyl and ethyl valerates. *SAE Technical Paper*, 2013-24. 98.
- 543 D'Auria, J. C., 2006. Acyltransferases in plants: a good time to be BAHD. *Current Opinion in Plant  
544 Biology.* 9, 331-340.

- 545 Feng, J., Zhang, J., Ma, Y., Feng, Y., Wang, S., Guo, N., Wang, H., Wang, P., Jiménez-Bonilla,  
546 P., Gu, Y., 2021. Renewable fatty acid ester production in *Clostridium*. *Nature*  
547 *Communications*. 12, 1-13.
- 548 Garcia, S., Trinh, C. T., 2019a. Modular design: Implementing proven engineering principles in  
549 biotechnology. *Biotechnology Advances*. 37, 107403.
- 550 Garcia, S., Trinh, C. T., 2019b. Multiobjective strain design: A framework for modular cell  
551 engineering. *Metabolic engineering*. 51, 110-120.
- 552 Garcia, S., Trinh, C. T., 2020. Harnessing Natural Modularity of Metabolism with Goal Attainment  
553 Optimization to Design a Modular Chassis Cell for Production of Diverse Chemicals. *ACS*  
554 *Synthetic Biology*. 9, 1665-1681.
- 555 Gorochowski, T. E., Ignatova, Z., Bovenberg, R. A. L., Roubos, J. A., 2015. Trade-offs between  
556 tRNA abundance and mRNA secondary structure support smoothing of translation  
557 elongation rate. *Nucleic Acids Research*. 43, 3022-3032.
- 558 Hebditch, M., Carballo-Amador, M. A., Charonis, S., Curtis, R., Warwicker, J., 2017. Protein-Sol:  
559 a web tool for predicting protein solubility from sequence. *Bioinformatics*. 33, 3098-3100.
- 560 Horton, C. E., Bennett, G. N., 2006. Ester production in *E. coli* and *C. acetobutylicum*. *Enzyme*  
561 *and microbial technology*. 38, 937-943.
- 562 Horton, C. E., Huang, K.-X., Bennett, G. N., Rudolph, F. B., 2003. Heterologous expression of the  
563 *Saccharomyces cerevisiae* alcohol acetyltransferase genes in *Clostridium acetobutylicum*  
564 and *Escherichia coli* for the production of isoamyl acetate. *Journal of Industrial*  
565 *Microbiology and Biotechnology*. 30, 427-432.
- 566 Jenkins, R. W., Munro, M., Nash, S., Chuck, C. J., 2013. Potential renewable oxygenated biofuels  
567 for the aviation and road transport sectors. *Fuel*. 103, 593-599.

- 568 Lavallie, E. R., Diblasio, E. A., Kovacic, S., Grant, K. L., Schendel, P. F., Mccoy, J. M., 1993. A  
569 Thioredoxin Gene Fusion Expression System That Circumvents Inclusion Body Formation  
570 in the Escherichia-Coli Cytoplasm. *Nature Biotechnology*. 11, 187-193.
- 571 Layton, D. S., Trinh, C. T., 2014. Engineering modular ester fermentative pathways in *Escherichia*  
572 *coli*. *Metabolic Engineering*. 26, 77-88.
- 573 Layton, D. S., Trinh, C. T., 2016a. Expanding the modular ester fermentative pathways for  
574 combinatorial biosynthesis of esters from volatile organic acids. *Biotechnol Bioeng*. 113,  
575 1764-76.
- 576 Layton, D. S., Trinh, C. T., 2016b. Microbial synthesis of a branched-chain ester platform from  
577 organic waste carboxylates. *Metabolic Engineering Communications*. 3, 245-251.
- 578 Lee, J. W., Trinh, C. T., 2019. Microbial biosynthesis of lactate esters. *Biotechnology for Biofuels*.  
579 12.
- 580 Lee, J. W., Trinh, C. T., 2020. Towards renewable flavors, fragrances, and beyond. *Curr Opin*  
581 *Biotechnol*. 61, 168-180.
- 582 Lim, J. H., Seo, S. W., Kim, S. Y., Jung, G. Y., 2013. Model-driven rebalancing of the intracellular  
583 redox state for optimization of a heterologous n-butanol pathway in *Escherichia coli*.  
584 *Metabolic Engineering*. 20, 49-55.
- 585 Nielsen, D. R., Leonard, E., Yoon, S. H., Tseng, H. C., Yuan, C., Prather, K. L., 2009. Engineering  
586 alternative butanol production platforms in heterologous bacteria. *Metabolic engineering*.  
587 11, 262-273.
- 588 Philip, P., Kern, D., Goldmanns, J., Seiler, F., Schulte, A., Habicher, T., Buchs, J., 2018. Parallel  
589 substrate supply and pH stabilization for optimal screening of *E-coli* with the membrane-  
590 based fed-batch shake flask. *Microbial Cell Factories*. 17.

- 591 Raran-Kurussi, S., Waugh, D. S., 2014. Unrelated solubility-enhancing fusion partners MBP and  
592 NusA utilize a similar mode of action. *Biotechnol Bioeng.* 111, 2407-11.
- 593 Rodriguez, G. M., Tashiro, Y., Atsumi, S., 2014. Expanding ester biosynthesis in *Escherichia coli*.  
594 *Nature chemical biology.* 10, 259-265.
- 595 Rosano, G. L., Ceccarelli, E. A., 2009. Rare codon content affects the solubility of recombinant  
596 proteins in a codon bias-adjusted *Escherichia coli* strain. *Microb Cell Fact.* 8, 41.
- 597 Seo, H., Lee, J. W., Garcia, S., Trinh, C. T., 2019. Single mutation at a highly conserved region of  
598 chloramphenicol acetyltransferase enables isobutyl acetate production directly from  
599 cellulose by *Clostridium thermocellum* at elevated temperatures. *Biotechnology for*  
600 *Biofuels.* 12.
- 601 Seo, H., Lee, J. W., Giannone, R. J., Dunlap, N. J., Trinh, C. T., 2021. Engineering promiscuity of  
602 chloramphenicol acetyltransferase for microbial designer ester biosynthesis. *Metab Eng.*  
603 66, 179-190.
- 604 Shen, C. R., Lan, E. I., Dekishima, Y., Baez, A., Cho, K. M., Liao, J. C., 2011. High titer anaerobic  
605 1-butanol synthesis in *Escherichia coli* enabled by driving forces. *Appl. Environ.*  
606 *Microbiol.*, AEM.03034-10.
- 607 Sillers, R., Chow, A., Tracy, B., Papoutsakis, E. T., 2008. Metabolic engineering of the non-  
608 sporulating, non-solventogenic *Clostridium acetobutylicum* strain M5 to produce butanol  
609 without acetone demonstrate the robustness of the acid-formation pathways and the  
610 importance of the electron balance. *Metabolic Engineering.* 10, 321-332.
- 611 Tai, Y. S., Xiong, M. Y., Zhang, K. C., 2015. Engineered biosynthesis of medium-chain esters in  
612 *Escherichia coli*. *Metabolic Engineering.* 27, 20-28.

- 613 Tashiro, Y., Desai, S. H., Atsumi, S., 2015. Two-dimensional isobutyl acetate production pathways  
614 to improve carbon yield. *Nat Commun.* 6, 7488.
- 615 Thomson, N. M., Saika, A., Ushimaru, K., Sangiambut, S., Tsuge, T., Summers, D. K., Sivaniah,  
616 E., 2013. Efficient Production of Active Polyhydroxyalkanoate Synthase in *Escherichia*  
617 *coli* by Coexpression of Molecular Chaperones. *Applied and Environmental Microbiology.*  
618 79, 1948-1955.
- 619 Trinh, C. T., Liu, Y., Conner, D. J., 2015. Rational design of efficient modular cells. *Metabolic*  
620 *engineering.* 32, 220-231.
- 621 Trinh, C. T., Unrean, P., Srienc, F., 2008. Minimal *Escherichia coli* cell for the most efficient  
622 production of ethanol from hexoses and pentoses. *Applied and Environmental*  
623 *Microbiology.* 74, 3634-3643.
- 624 Vadali, R., Horton, C., Rudolph, F., Bennett, G., San, K.-Y., 2004. Production of isoamyl acetate  
625 in *ackA-pta* and/or *ldh* mutants of *Escherichia coli* with overexpression of yeast ATF2.  
626 *Applied Microbiology and Biotechnology.* 63, 698-704.
- 627 van Wyk, N., Kroukamp, H., Pretorius, I. S., 2018. The Smell of Synthetic Biology: Engineering  
628 Strategies for Aroma Compound Production in Yeast. *Fermentation-Basel.* 4.
- 629 Waugh, D. S., 2016. The remarkable solubility-enhancing power of *Escherichia coli* maltose-  
630 binding protein. *Postepy Biochem.* 62, 377-382.
- 631 Wilbanks, B., Layton, D. S., Garcia, S., Trinh, C. T., 2018. A Prototype for Modular Cell  
632 Engineering. *ACS Synthetic Biology.* 7, 187-199.
- 633 Wilbanks, B., Trinh, C. T., 2017. Comprehensive characterization of toxicity of fermentative  
634 metabolites on microbial growth. *Biotechnology for Biofuels.* 10, 262.

- 635 Zhang, M., Eddy, C., Deanda, K., Finkelstein, M., Picataggio, S., 1995. Metabolic Engineering of  
636 a Pentose Metabolism Pathway in Ethanologenic *Zymomonas mobilis*. *Science*. 267, 240-  
637 243.
- 638 Zhu, J., Lin, J. L., Palomec, L., Wheeldon, I., 2015. Microbial host selection affects intracellular  
639 localization and activity of alcohol-O-acetyltransferase. *Microb Cell Fact*. 14, 35.
- 640

641 **Table 1.** A list of strains and plasmids used in this study. Except for EcJWBA15, TCS083  $\Delta$ *fadE* (DE3) (Layton and Trinh, 2014) was used as  
 642 a host strain. For EcJWBA15, TCS095 (DE3) (Wilbanks et al., 2018) was used as a host strain. Key strains are in bold.

| Strains         | Plasmid 1                                                                                                                                | Plasmid 2                                                                                                                                                     | Plasmid 3                                                |
|-----------------|------------------------------------------------------------------------------------------------------------------------------------------|---------------------------------------------------------------------------------------------------------------------------------------------------------------|----------------------------------------------------------|
| EcJWBA1         | pACYCD <sub>P<sub>T7</sub>lac</sub> ::atoB <sub>Ec</sub> ::hbd <sub>Ca</sub> ::crt <sub>Ca</sub> -P <sub>T7</sub> lac::ter <sub>Td</sub> | pETD <sub>P<sub>T7</sub>lac</sub> ::adhE2 <sub>Ca</sub> ::fdh <sub>Cb</sub> -P <sub>T7</sub> lac::ATF1 <sub>Sc</sub>                                          | -                                                        |
| EcJWBA2         | pACYCD <sub>P<sub>T7</sub>lac</sub> ::atoB <sub>Ec</sub> ::hbd <sub>Ca</sub> ::crt <sub>Ca</sub> -P <sub>T7</sub> lac::ter <sub>Td</sub> | pRSFD <sub>P<sub>T7</sub>lac</sub> ::adhE2 <sub>Ca</sub> ::fdh <sub>Cb</sub> -P <sub>T7</sub> lac::ATF1 <sub>Sc</sub>                                         | -                                                        |
| EcJWBA3         | pETD <sub>P<sub>T7</sub>lac</sub> ::atoB <sub>Ec</sub> ::hbd <sub>Ca</sub> ::crt <sub>Ca</sub> -P <sub>T7</sub> lac::ter <sub>Td</sub>   | pACYCD <sub>P<sub>T7</sub>lac</sub> ::adhE2 <sub>Ca</sub> ::fdh <sub>Cb</sub> -P <sub>T7</sub> lac::ATF1 <sub>Sc</sub>                                        | -                                                        |
| EcJWBA4         | pETD <sub>P<sub>T7</sub>lac</sub> ::atoB <sub>Ec</sub> ::hbd <sub>Ca</sub> ::crt <sub>Ca</sub> -P <sub>T7</sub> lac::ter <sub>Td</sub>   | pRSFD <sub>P<sub>T7</sub>lac</sub> ::adhE2 <sub>Ca</sub> ::fdh <sub>Cb</sub> -P <sub>T7</sub> lac::ATF1 <sub>Sc</sub>                                         | -                                                        |
| EcJWBA5         | pRSFD <sub>P<sub>T7</sub>lac</sub> ::atoB <sub>Ec</sub> ::hbd <sub>Ca</sub> ::crt <sub>Ca</sub> -P <sub>T7</sub> lac::ter <sub>Td</sub>  | pACYCD <sub>P<sub>T7</sub>lac</sub> ::adhE2 <sub>Ca</sub> ::fdh <sub>Cb</sub> -P <sub>T7</sub> lac::ATF1 <sub>Sc</sub>                                        | -                                                        |
| EcJWBA6         | pRSFD <sub>P<sub>T7</sub>lac</sub> ::atoB <sub>Ec</sub> ::hbd <sub>Ca</sub> ::crt <sub>Ca</sub> -P <sub>T7</sub> lac::ter <sub>Td</sub>  | pETD <sub>P<sub>T7</sub>lac</sub> ::adhE2 <sub>Ca</sub> ::fdh <sub>Cb</sub> -P <sub>T7</sub> lac::ATF1 <sub>Sc</sub>                                          | -                                                        |
| EcJWBA7         | pACYCD <sub>P<sub>T7</sub>lac</sub> ::atoB <sub>Ec</sub> ::hbd <sub>Ca</sub> ::crt <sub>Ca</sub> -P <sub>T7</sub> lac::ter <sub>Td</sub> | pRSFD <sub>P<sub>T7</sub>lac</sub> ::adhE2 <sub>Ca</sub> ::fdh <sub>Cb</sub> -P <sub>T7</sub> lac::ATF1 <sub>Sc</sub> <sup>opt</sup>                          | -                                                        |
| EcJWBA8         | pACYCD <sub>P<sub>T7</sub>lac</sub> ::atoB <sub>Ec</sub> ::hbd <sub>Ca</sub> ::crt <sub>Ca</sub> -P <sub>T7</sub> lac::ter <sub>Td</sub> | pRSFD <sub>P<sub>T7</sub>lac</sub> ::adhE2 <sub>Ca</sub> ::fdh <sub>Cb</sub> -P <sub>T7</sub> lac::malE_ATF1 <sub>Sc</sub> <sup>opt</sup>                     | -                                                        |
| EcJWBA9         | pACYCD <sub>P<sub>T7</sub>lac</sub> ::atoB <sub>Ec</sub> ::hbd <sub>Ca</sub> ::crt <sub>Ca</sub> -P <sub>T7</sub> lac::ter <sub>Td</sub> | pRSFD <sub>P<sub>T7</sub>lac</sub> ::adhE2 <sub>Ca</sub> ::fdh <sub>Cb</sub> -P <sub>T7</sub> lac::nusA_ATF1 <sub>Sc</sub> <sup>opt</sup>                     | -                                                        |
| EcJWBA10        | pACYCD <sub>P<sub>T7</sub>lac</sub> ::atoB <sub>Ec</sub> ::hbd <sub>Ca</sub> ::crt <sub>Ca</sub> -P <sub>T7</sub> lac::ter <sub>Td</sub> | pRSFD <sub>P<sub>T7</sub>lac</sub> ::adhE2 <sub>Ca</sub> ::fdh <sub>Cb</sub> -P <sub>T7</sub> lac::trxA_ATF1 <sub>Sc</sub> <sup>opt</sup>                     | -                                                        |
| EcJWBA11        | pACYCD <sub>P<sub>T7</sub>lac</sub> ::atoB <sub>Ec</sub> ::hbd <sub>Ca</sub> ::crt <sub>Ca</sub> -P <sub>T7</sub> lac::ter <sub>Td</sub> | pRSFD <sub>P<sub>T7</sub>lac</sub> ::adhE2 <sub>Ca</sub> <sup>opt</sup> ::fdh <sub>Cb</sub> -P <sub>T7</sub> lac::trxA_ATF1 <sub>Sc</sub> <sup>opt</sup>      | -                                                        |
| EcJWBA12        | pACYCD <sub>P<sub>T7</sub>lac</sub> ::atoB <sub>Ec</sub> ::hbd <sub>Ca</sub> ::crt <sub>Ca</sub> -P <sub>T7</sub> lac::ter <sub>Td</sub> | pRSFD <sub>P<sub>T7</sub>lac</sub> ::malE_adhE2 <sub>Ca</sub> <sup>opt</sup> ::fdh <sub>Cb</sub> -P <sub>T7</sub> lac::trxA_ATF1 <sub>Sc</sub> <sup>opt</sup> | -                                                        |
| EcJWBA13        | pACYCD <sub>P<sub>T7</sub>lac</sub> ::atoB <sub>Ec</sub> ::hbd <sub>Ca</sub> ::crt <sub>Ca</sub> -P <sub>T7</sub> lac::ter <sub>Td</sub> | pRSFD <sub>P<sub>T7</sub>lac</sub> ::nusA_adhE2 <sub>Ca</sub> <sup>opt</sup> ::fdh <sub>Cb</sub> -P <sub>T7</sub> lac::trxA_ATF1 <sub>Sc</sub> <sup>opt</sup> | -                                                        |
| EcJWBA14        | pACYCD <sub>P<sub>T7</sub>lac</sub> ::atoB <sub>Ec</sub> ::hbd <sub>Ca</sub> ::crt <sub>Ca</sub> -P <sub>T7</sub> lac::ter <sub>Td</sub> | pRSFD <sub>P<sub>T7</sub>lac</sub> ::trxA_adhE2 <sub>Ca</sub> <sup>opt</sup> ::fdh <sub>Cb</sub> -P <sub>T7</sub> lac::trxA_ATF1 <sub>Sc</sub> <sup>opt</sup> | -                                                        |
| <b>EcJWBA15</b> | pACYCD <sub>P<sub>T7</sub>lac</sub> ::atoB <sub>Ec</sub> ::hbd <sub>Ca</sub> ::crt <sub>Ca</sub> -P <sub>T7</sub> lac::ter <sub>Td</sub> | pRSFD <sub>P<sub>T7</sub>lac</sub> ::trxA_adhE2 <sub>Ca</sub> <sup>opt</sup> ::fdh <sub>Cb</sub> -P <sub>T7</sub> lac::trxA_ATF1 <sub>Sc</sub> <sup>opt</sup> | -                                                        |
| EcJWEB1         | pACYCD <sub>P<sub>T7</sub>lac</sub> ::atoB <sub>Ec</sub> ::hbd <sub>Ca</sub> ::crt <sub>Ca</sub> -P <sub>T7</sub> lac::ter <sub>Td</sub> | pETD <sub>P<sub>T7</sub>lac</sub> ::pdcZ <sub>m</sub> ::adhB <sub>Zm</sub> ::fdh <sub>Cb</sub> -P <sub>T7</sub> lac::SAAT <sub>Fa</sub>                       | -                                                        |
| EcJWEB2         | pACYCD <sub>P<sub>T7</sub>lac</sub> ::atoB <sub>Ec</sub> ::hbd <sub>Ca</sub> ::crt <sub>Ca</sub> -P <sub>T7</sub> lac::ter <sub>Td</sub> | pRSFD <sub>P<sub>T7</sub>lac</sub> ::pdcZ <sub>m</sub> ::adhB <sub>Zm</sub> ::fdh <sub>Cb</sub> -P <sub>T7</sub> lac::SAAT <sub>Fa</sub>                      | -                                                        |
| EcJWEB3         | pETD <sub>P<sub>T7</sub>lac</sub> ::atoB <sub>Ec</sub> ::hbd <sub>Ca</sub> ::crt <sub>Ca</sub> -P <sub>T7</sub> lac::ter <sub>Td</sub>   | pACYCD <sub>P<sub>T7</sub>lac</sub> ::pdcZ <sub>m</sub> ::adhB <sub>Zm</sub> ::fdh <sub>Cb</sub> -P <sub>T7</sub> lac::SAAT <sub>Fa</sub>                     | -                                                        |
| EcJWEB4         | pETD <sub>P<sub>T7</sub>lac</sub> ::atoB <sub>Ec</sub> ::hbd <sub>Ca</sub> ::crt <sub>Ca</sub> -P <sub>T7</sub> lac::ter <sub>Td</sub>   | pRSFD <sub>P<sub>T7</sub>lac</sub> ::pdcZ <sub>m</sub> ::adhB <sub>Zm</sub> ::fdh <sub>Cb</sub> -P <sub>T7</sub> lac::SAAT <sub>Fa</sub>                      | -                                                        |
| EcJWEB5         | pRSFD <sub>P<sub>T7</sub>lac</sub> ::atoB <sub>Ec</sub> ::hbd <sub>Ca</sub> ::crt <sub>Ca</sub> -P <sub>T7</sub> lac::ter <sub>Td</sub>  | pACYCD <sub>P<sub>T7</sub>lac</sub> ::pdcZ <sub>m</sub> ::adhB <sub>Zm</sub> ::fdh <sub>Cb</sub> -P <sub>T7</sub> lac::SAAT <sub>Fa</sub>                     | -                                                        |
| EcJWEB6         | pRSFD <sub>P<sub>T7</sub>lac</sub> ::atoB <sub>Ec</sub> ::hbd <sub>Ca</sub> ::crt <sub>Ca</sub> -P <sub>T7</sub> lac::ter <sub>Td</sub>  | pETD <sub>P<sub>T7</sub>lac</sub> ::pdcZ <sub>m</sub> ::adhB <sub>Zm</sub> ::fdh <sub>Cb</sub> -P <sub>T7</sub> lac::SAAT <sub>Fa</sub>                       | -                                                        |
| <b>EcJWEB7</b>  | pACYCD <sub>P<sub>T7</sub>lac</sub> ::atoB <sub>Ec</sub> ::hbd <sub>Ca</sub> ::crt <sub>Ca</sub> -P <sub>T7</sub> lac::ter <sub>Td</sub> | pRSFD <sub>P<sub>T7</sub>lac</sub> ::pdcZ <sub>m</sub> ::adhB <sub>Zm</sub> ::fdh <sub>Cb</sub> -P <sub>T7</sub> lac::SAAT <sub>Fa</sub>                      | pACYC P <sub>araB</sub> ::groES::groEL; Amp <sup>R</sup> |
| EcJWBB1         | pACYCD <sub>P<sub>T7</sub>lac</sub> ::atoB <sub>Ec</sub> ::hbd <sub>Ca</sub> ::crt <sub>Ca</sub> -P <sub>T7</sub> lac::ter <sub>Td</sub> | pETD <sub>P<sub>T7</sub>lac</sub> ::adhE2 <sub>Ca</sub> ::fdh <sub>Cb</sub> -P <sub>T7</sub> lac::SAAT <sub>Fa</sub>                                          | -                                                        |
| EcJWBB2         | pACYCD <sub>P<sub>T7</sub>lac</sub> ::atoB <sub>Ec</sub> ::hbd <sub>Ca</sub> ::crt <sub>Ca</sub> -P <sub>T7</sub> lac::ter <sub>Td</sub> | pRSFD <sub>P<sub>T7</sub>lac</sub> ::adhE2 <sub>Ca</sub> ::fdh <sub>Cb</sub> -P <sub>T7</sub> lac::SAAT <sub>Fa</sub>                                         | -                                                        |
| EcJWBB3         | pETD <sub>P<sub>T7</sub>lac</sub> ::atoB <sub>Ec</sub> ::hbd <sub>Ca</sub> ::crt <sub>Ca</sub> -P <sub>T7</sub> lac::ter <sub>Td</sub>   | pACYCD <sub>P<sub>T7</sub>lac</sub> ::adhE2 <sub>Ca</sub> ::fdh <sub>Cb</sub> -P <sub>T7</sub> lac::SAAT <sub>Fa</sub>                                        | -                                                        |
| EcJWBB4         | pETD <sub>P<sub>T7</sub>lac</sub> ::atoB <sub>Ec</sub> ::hbd <sub>Ca</sub> ::crt <sub>Ca</sub> -P <sub>T7</sub> lac::ter <sub>Td</sub>   | pRSFD <sub>P<sub>T7</sub>lac</sub> ::adhE2 <sub>Ca</sub> ::fdh <sub>Cb</sub> -P <sub>T7</sub> lac::SAAT <sub>Fa</sub>                                         | -                                                        |
| EcJWBB5         | pRSFD <sub>P<sub>T7</sub>lac</sub> ::atoB <sub>Ec</sub> ::hbd <sub>Ca</sub> ::crt <sub>Ca</sub> -P <sub>T7</sub> lac::ter <sub>Td</sub>  | pACYCD <sub>P<sub>T7</sub>lac</sub> ::adhE2 <sub>Ca</sub> ::fdh <sub>Cb</sub> -P <sub>T7</sub> lac::SAAT <sub>Fa</sub>                                        | -                                                        |
| EcJWBB6         | pRSFD <sub>P<sub>T7</sub>lac</sub> ::atoB <sub>Ec</sub> ::hbd <sub>Ca</sub> ::crt <sub>Ca</sub> -P <sub>T7</sub> lac::ter <sub>Td</sub>  | pETD <sub>P<sub>T7</sub>lac</sub> ::adhE2 <sub>Ca</sub> ::fdh <sub>Cb</sub> -P <sub>T7</sub> lac::SAAT <sub>Fa</sub>                                          | -                                                        |
| EcJWBB7         | pACYCD <sub>P<sub>T7</sub>lac</sub> ::atoB <sub>Ec</sub> ::hbd <sub>Ca</sub> ::crt <sub>Ca</sub> -P <sub>T7</sub> lac::ter <sub>Td</sub> | pRSFD <sub>P<sub>T7</sub>lac</sub> ::adhE2 <sub>Ca</sub> ::fdh <sub>Cb</sub> -P <sub>T7</sub> lac::SAAT <sub>Fa</sub>                                         | pACYC P <sub>araB</sub> ::groES::groEL; Amp <sup>R</sup> |
| <b>EcJWBB8</b>  | pACYCD <sub>P<sub>T7</sub>lac</sub> ::atoB <sub>Ec</sub> ::hbd <sub>Ca</sub> ::crt <sub>Ca</sub> -P <sub>T7</sub> lac::ter <sub>Td</sub> | pRSFD <sub>P<sub>T7</sub>lac</sub> ::trxA_adhE2 <sub>Ca</sub> <sup>opt</sup> ::fdh <sub>Cb</sub> -P <sub>T7</sub> lac::SAAT <sub>Fa</sub>                     | -                                                        |

643  
644



645

**Table 1.** (Continued)

| Strains                  | Plasmid 1                                                                                                       | Plasmid 2                                                                    | Plasmid 3                                                                    |
|--------------------------|-----------------------------------------------------------------------------------------------------------------|------------------------------------------------------------------------------|------------------------------------------------------------------------------|
| EcJWATF1                 | pET29 P <sub>T7lac</sub> ::ATF1 <sub>Sc</sub>                                                                   | -                                                                            | -                                                                            |
| EcJWATF1 <sup>opt</sup>  | pET29 P <sub>T7lac</sub> ::ATF1 <sub>Sc</sub> <sup>opt</sup>                                                    | -                                                                            | -                                                                            |
| EcJWATF1 <sup>MBP</sup>  | pET29 P <sub>T7lac</sub> ::malE_ATF1 <sub>Sc</sub>                                                              | -                                                                            | -                                                                            |
| EcJWATF1 <sup>NusA</sup> | pET29 P <sub>T7lac</sub> ::nusA_ATF1 <sub>Sc</sub>                                                              | -                                                                            | -                                                                            |
| EcJWATF1 <sup>TrxA</sup> | pET29 P <sub>T7lac</sub> ::trxA_ATF1 <sub>Sc</sub>                                                              | -                                                                            | -                                                                            |
| EcJWATF1 <sup>Chp1</sup> | pET29 P <sub>T7lac</sub> ::ATF1 <sub>Sc</sub>                                                                   | pACYC P <sub>araB</sub> ::tig                                                | -                                                                            |
| EcJWATF1 <sup>Chp2</sup> | pET29 P <sub>T7lac</sub> ::ATF1 <sub>Sc</sub>                                                                   | pACYC P <sub>araB</sub> ::groES::groEL                                       | -                                                                            |
| EcJWATF1 <sup>Chp3</sup> | pET29 P <sub>T7lac</sub> ::ATF1 <sub>Sc</sub>                                                                   | pACYC P <sub>pzt-1</sub> ::groES::groEL::tig                                 | -                                                                            |
| EcJWATF1 <sup>Chp4</sup> | pET29 P <sub>T7lac</sub> ::ATF1 <sub>Sc</sub>                                                                   | pACYC P <sub>araB</sub> ::dnaK::dnaJ::grpE                                   | -                                                                            |
| EcJWATF1 <sup>Chp5</sup> | pET29 P <sub>T7lac</sub> ::ATF1 <sub>Sc</sub>                                                                   | pACYC P <sub>araB</sub> ::dnaK::dnaJ::grpE-P <sub>pzt-1</sub> ::groES::groEL | -                                                                            |
| EcJWSAAT                 | pETD P <sub>T7lac</sub> ::atoB <sub>Ec</sub> ::hbd <sub>Ca</sub> ::crtCa-P <sub>T7lac</sub> ::ter <sub>Td</sub> | pET29 P <sub>T7lac</sub> ::SAAT <sub>Sc</sub>                                | -                                                                            |
| EcJWSAAT <sup>opt</sup>  | pETD P <sub>T7lac</sub> ::atoB <sub>Ec</sub> ::hbd <sub>Ca</sub> ::crtCa-P <sub>T7lac</sub> ::ter <sub>Td</sub> | pET29 P <sub>T7lac</sub> ::SAAT <sub>Fa</sub> <sup>opt</sup>                 | -                                                                            |
| EcJWSAAT <sup>MBP</sup>  | pETD P <sub>T7lac</sub> ::atoB <sub>Ec</sub> ::hbd <sub>Ca</sub> ::crtCa-P <sub>T7lac</sub> ::ter <sub>Td</sub> | pET29 P <sub>T7lac</sub> ::malE_SAAT <sub>Fa</sub>                           | -                                                                            |
| EcJWSAAT <sup>NusA</sup> | pETD P <sub>T7lac</sub> ::atoB <sub>Ec</sub> ::hbd <sub>Ca</sub> ::crtCa-P <sub>T7lac</sub> ::ter <sub>Td</sub> | pET29 P <sub>T7lac</sub> ::nusA_SAAT <sub>Fa</sub>                           | -                                                                            |
| EcJWSAAT <sup>TrxA</sup> | pETD P <sub>T7lac</sub> ::atoB <sub>Ec</sub> ::hbd <sub>Ca</sub> ::crtCa-P <sub>T7lac</sub> ::ter <sub>Td</sub> | pET29 P <sub>T7lac</sub> ::trxA_SAAT <sub>Fa</sub>                           | -                                                                            |
| EcJWSAAT <sup>Chp1</sup> | pETD P <sub>T7lac</sub> ::atoB <sub>Ec</sub> ::hbd <sub>Ca</sub> ::crtCa-P <sub>T7lac</sub> ::ter <sub>Td</sub> | pET29 P <sub>T7lac</sub> ::SAAT <sub>Sc</sub>                                | pACYC P <sub>araB</sub> ::tig                                                |
| EcJWSAAT <sup>Chp2</sup> | pETD P <sub>T7lac</sub> ::atoB <sub>Ec</sub> ::hbd <sub>Ca</sub> ::crtCa-P <sub>T7lac</sub> ::ter <sub>Td</sub> | pET29 P <sub>T7lac</sub> ::SAAT <sub>Sc</sub>                                | pACYC P <sub>araB</sub> ::groES::groEL                                       |
| EcJWSAAT <sup>Chp3</sup> | pETD P <sub>T7lac</sub> ::atoB <sub>Ec</sub> ::hbd <sub>Ca</sub> ::crtCa-P <sub>T7lac</sub> ::ter <sub>Td</sub> | pET29 P <sub>T7lac</sub> ::SAAT <sub>Sc</sub>                                | pACYC P <sub>pzt-1</sub> ::groES::groEL::tig                                 |
| EcJWSAAT <sup>Chp4</sup> | pETD P <sub>T7lac</sub> ::atoB <sub>Ec</sub> ::hbd <sub>Ca</sub> ::crtCa-P <sub>T7lac</sub> ::ter <sub>Td</sub> | pET29 P <sub>T7lac</sub> ::SAAT <sub>Sc</sub>                                | pACYC P <sub>araB</sub> ::dnaK::dnaJ::grpE                                   |
| EcJWSAAT <sup>Chp5</sup> | pETD P <sub>T7lac</sub> ::atoB <sub>Ec</sub> ::hbd <sub>Ca</sub> ::crtCa-P <sub>T7lac</sub> ::ter <sub>Td</sub> | pET29 P <sub>T7lac</sub> ::SAAT <sub>Sc</sub>                                | pACYC P <sub>araB</sub> ::dnaK::dnaJ::grpE-P <sub>pzt-1</sub> ::groES::groEL |

646

647

648

649

650

651

652

653

654

655

656

657

658 **FIGURE LEGENDS**

659

660 **Figure 1.** Design of the *de novo* modular microbial biosynthesis of butyryl-CoA-derived esters.

661 **(a)** Biosynthesis of esters by an alcohol acyltransferase (AAT). **(b)** Modular biosynthetic pathways

662 of butyryl-CoA-derived esters. Distinct biosynthesis pathways of each butyryl-CoA-derived ester

663 are presented with colored lines as follows: Ethyl acetate (in blue), Butyl acetate (in grey), Ethyl

664 butyrate (in yellow), and Butyl butyrate (in red). **(c)** Schematic representation of modular plasmid

665 assembly to build the butyryl-CoA-derived ester pathways.

666

667 **Figure 2.** *De novo* microbial biosynthesis of butyl acetate (BA) production from glucose. **(a)**

668 Modular biosynthesis pathway of BA. **(b)** Schematic of six initial strains carrying BA production

669 modules with different copy numbers. The copy number of origins of replication are as follows:

670 P15A (in green), ~10; ColE1 (in blue), ~40; RSF1030 (in red), ~100 (Lee and Trinh, 2019). **(c-f)**

671 *De novo* BA production from glucose. Endogenous BA production in **(c)** six initial strains

672 (EcJWBA1~EcJWBA6). **(d)** Improved BA production in EcJWBA2~EcJWBA15. **(e)** Summary

673 of BA production. **(f)** Comparison of BA selectivity between initial (EcJWBA2) and final

674 (EcJWBA15) strains. For pie charts, EA is shown in blue and BA in gray. Error bars represent the

675 standard deviation of at least two biological replicates. Abbreviations: cond.: conditions, opt.:

676 optimization.

677

678 **Figure 3.** *De novo* microbial biosynthesis of ethyl butyrate (EB) production from glucose. **(a)**

679 Modular biosynthesis pathway of EB. **(b)** Schematic of six initial strains carrying EB production

680 modules with different copy numbers. The copy number of origins of replication are as follows:

681 P15A (in green), ~10; ColE1 (in blue), ~40; RSF1030 (in red), ~100 (Lee and Trinh, 2019). **(c-f)**  
682 *De novo* EB production from glucose. Endogenous EB production in **(c)** six initial strains  
683 (EcJWEB1~EcJWEB6). **(d)** Improved EB production in EcJWEB7; **(e)** Summary of EB  
684 production. **(f)** Comparison of EB selectivity between initial (EcJWEB2) and final (EcJWEB7)  
685 strains. For pie charts, EA is shown in blue, BA in gray, EB in orange, and BB in yellow. Error  
686 bars represent the standard deviation of at least two biological replicates. Abbreviations: cond.:  
687 conditions, opt.: optimization.

688  
689 **Figure 4.** *De novo* microbial biosynthesis of butyl butyrate (BB) production from glucose. **(a)**  
690 Modular biosynthesis pathway of BB. **(b)** Schematic of initial six strains carrying BB production  
691 modules with different copy numbers. The copy number of origins of replication are as follows:  
692 P15A (in green), ~10; ColE1 (in blue), ~40; RSF1030 (in red), ~100 (Lee and Trinh, 2019). **(c-f)**  
693 *De novo* BB production from glucose. Endogenous BB production in **(c)** six initial strains  
694 (EcJWBB1~EcJWBB6). **(d)** Improved BB production in EcJWBB7~EcJWBB8. **(e)** Summary of  
695 BB production. **(f)** Comparison of BB selectivity between initial (EcJWBB2) and final  
696 (EcJWBB8) strains. For pie charts, EA is shown in blue, BA in gray, EB in orange, and BB in  
697 yellow. Error bars represent the standard deviation of at least two biological replicates.  
698 Abbreviations: cond.: conditions, opt.: optimization, *n.d.*: not detected.

699  
700 **Figure 5.** Protein solubilization of AATs. **(a)** Schematic presentation of protein solubilization  
701 strategies used in this study. **(b-d)** Bioconversion of an alcohol into an ester by ATF1<sub>Sc</sub> derivatives.  
702 **(b)** Proposed bioconversion pathway of an alcohol (ethanol/butanol) into an ester (ethyl acetate  
703 (EA)/butyl acetate (BA)) by ATF1<sub>Sc</sub> in *E. coli*. Conversion of **(c)** ethanol into EA, and **(d)** butanol

704 into BA in engineered *E. coli*. **(e-g)** Bioconversion of an alcohol into an ester by SAAT<sub>Fa</sub>  
705 derivatives. **(e)** Proposed bioconversion pathway of an alcohol (ethanol/butanol) into an ester  
706 (ethyl butyrate (EB)/butyl butyrate (BB)) by SAAT<sub>Fa</sub> in *E. coli*. Conversion of **(b)** ethanol into EB  
707 and **(c)** butanol into BB in the engineered *E. coli*. Grey box indicates a negative control. Error bars  
708 represent the standard deviation of three biological replicates. Each ester conversion (%) was  
709 calculated by (target ester produced)/(target ester produced + corresponding alcohol substrate  
710 remained)\*100 (mole/mole).  
711

712 **Figure 1**

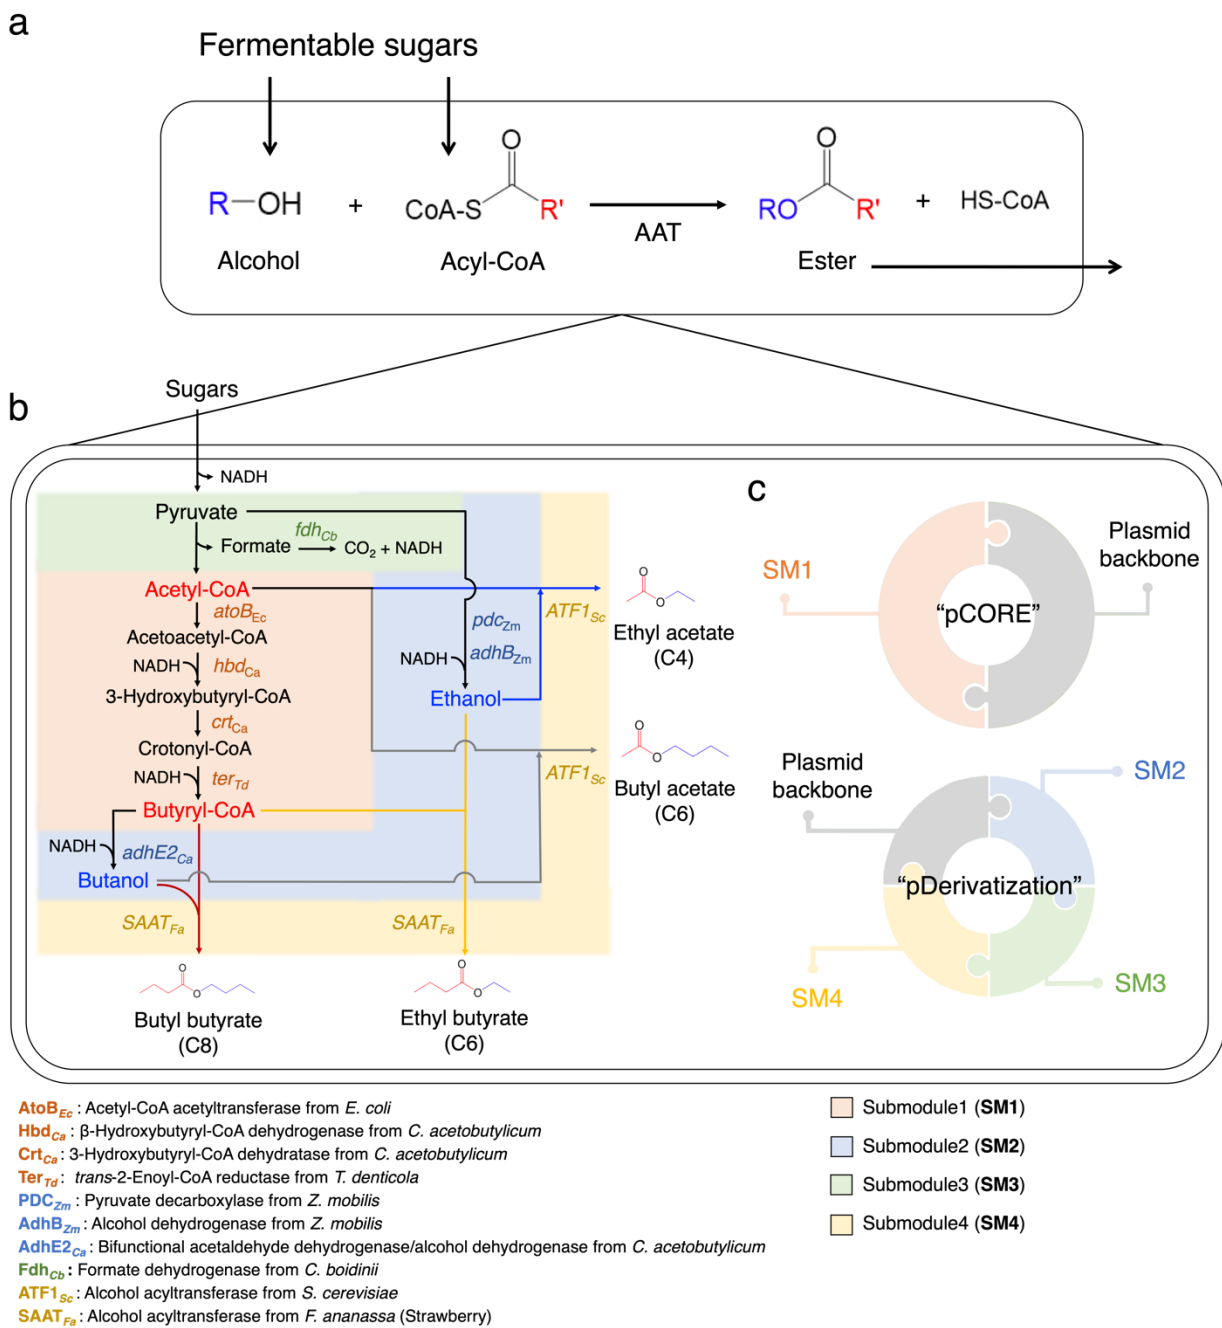

713

714

715 **Figure 2**

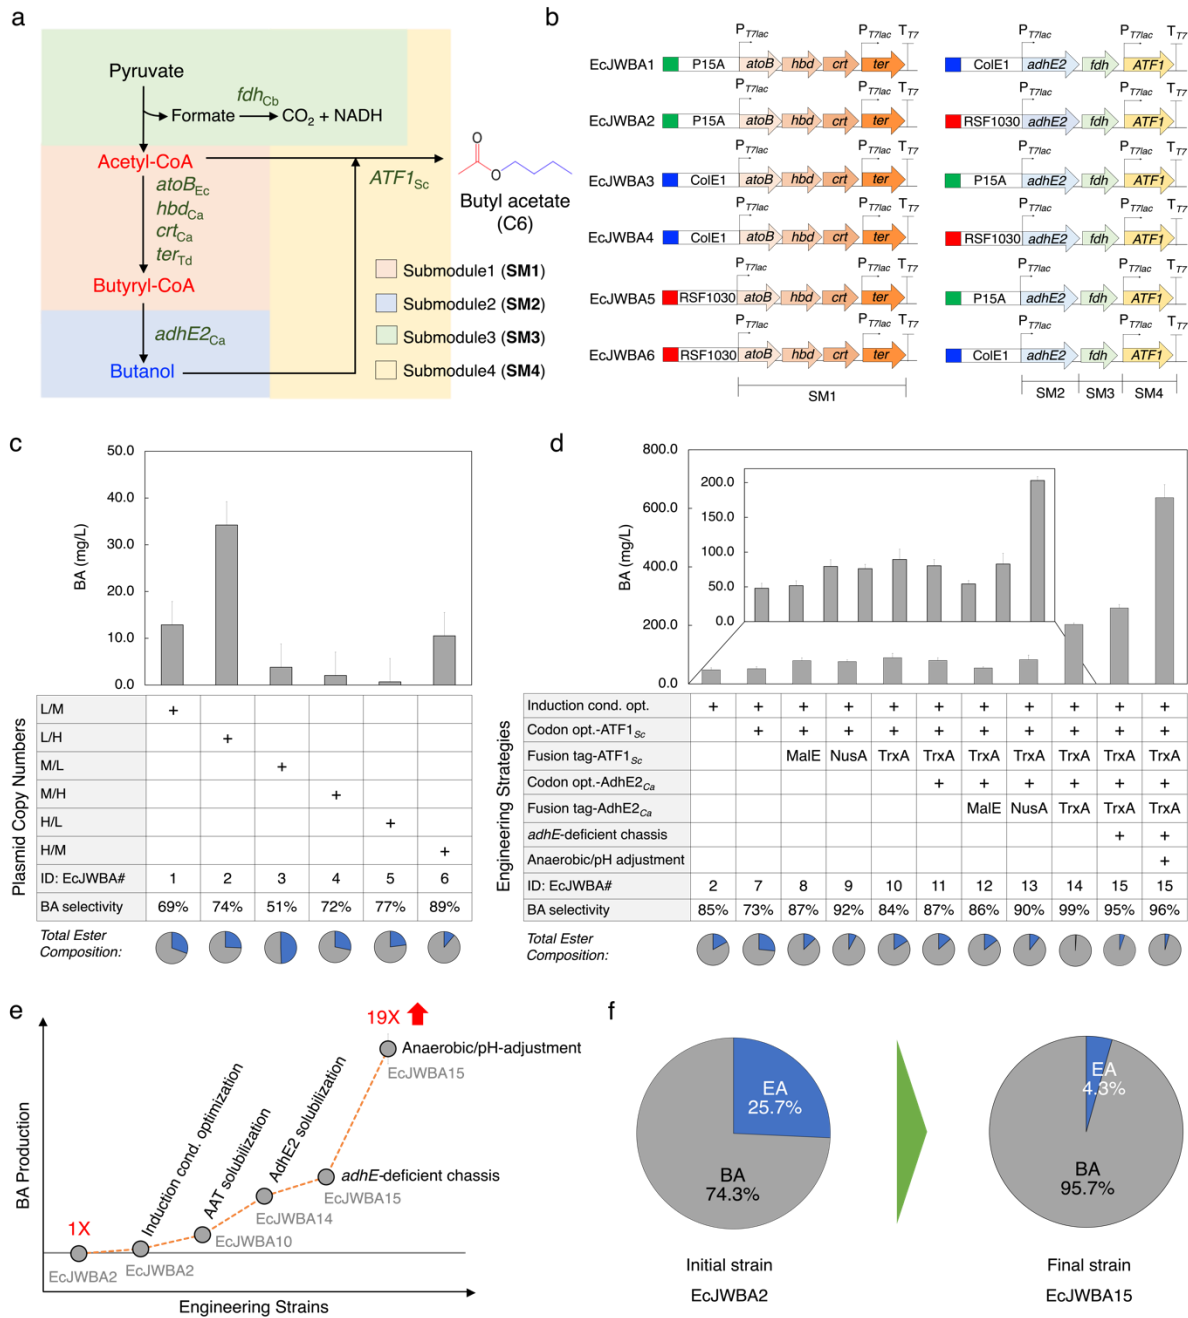

716

717

718 **Figure 3**

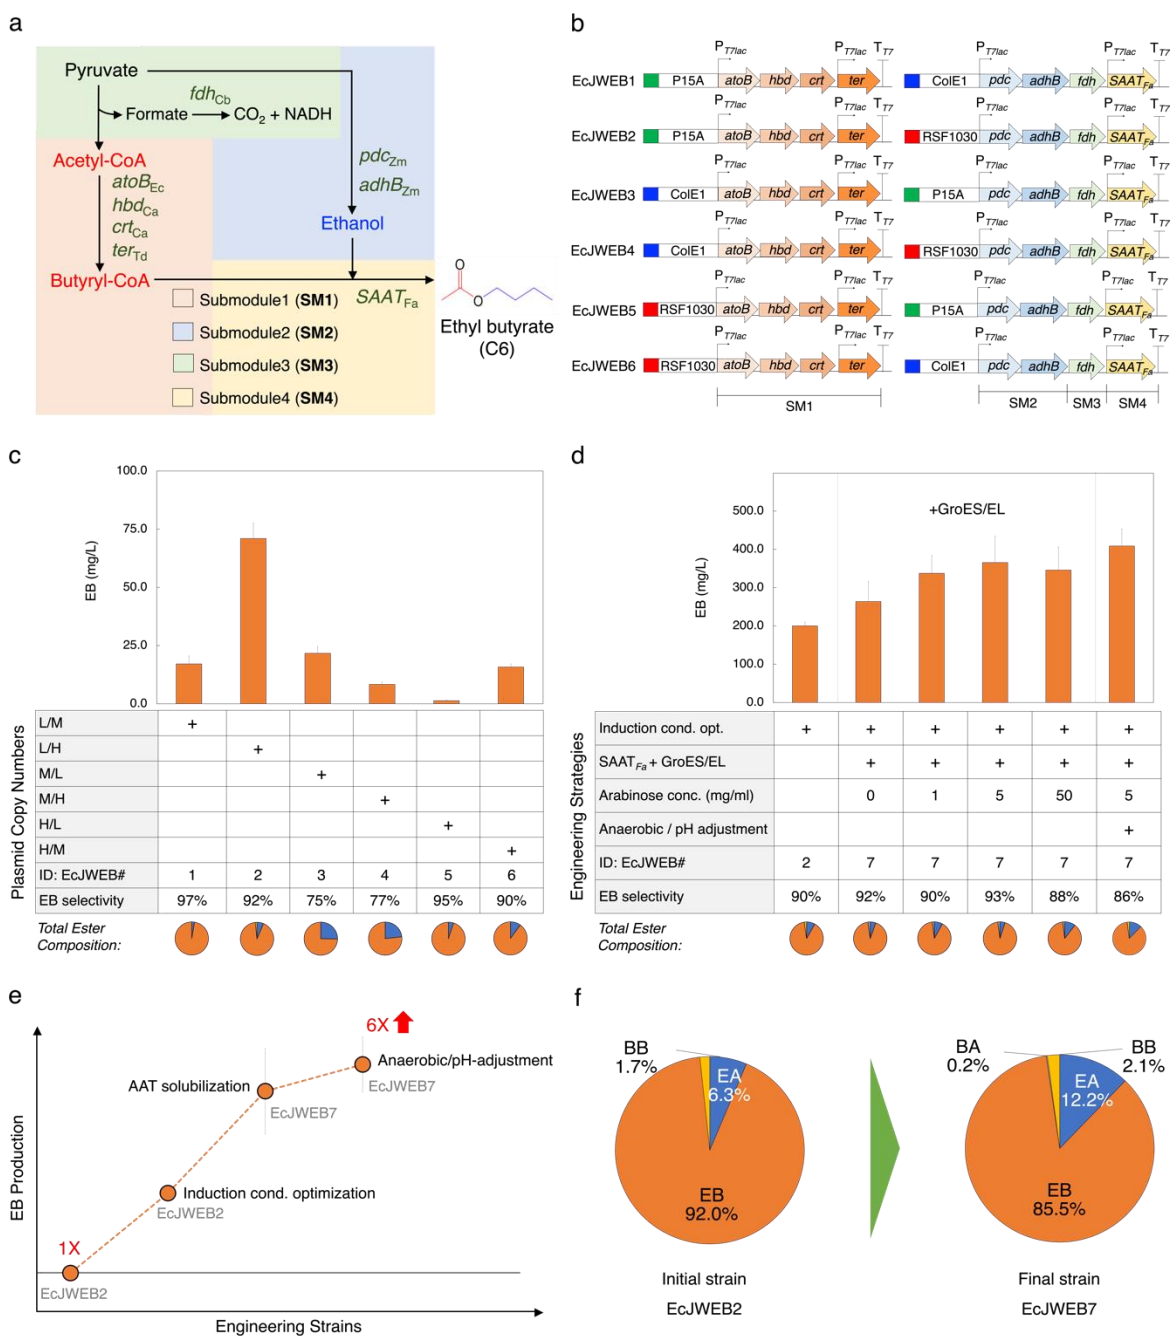

719

720

721

722 **Figure 4**

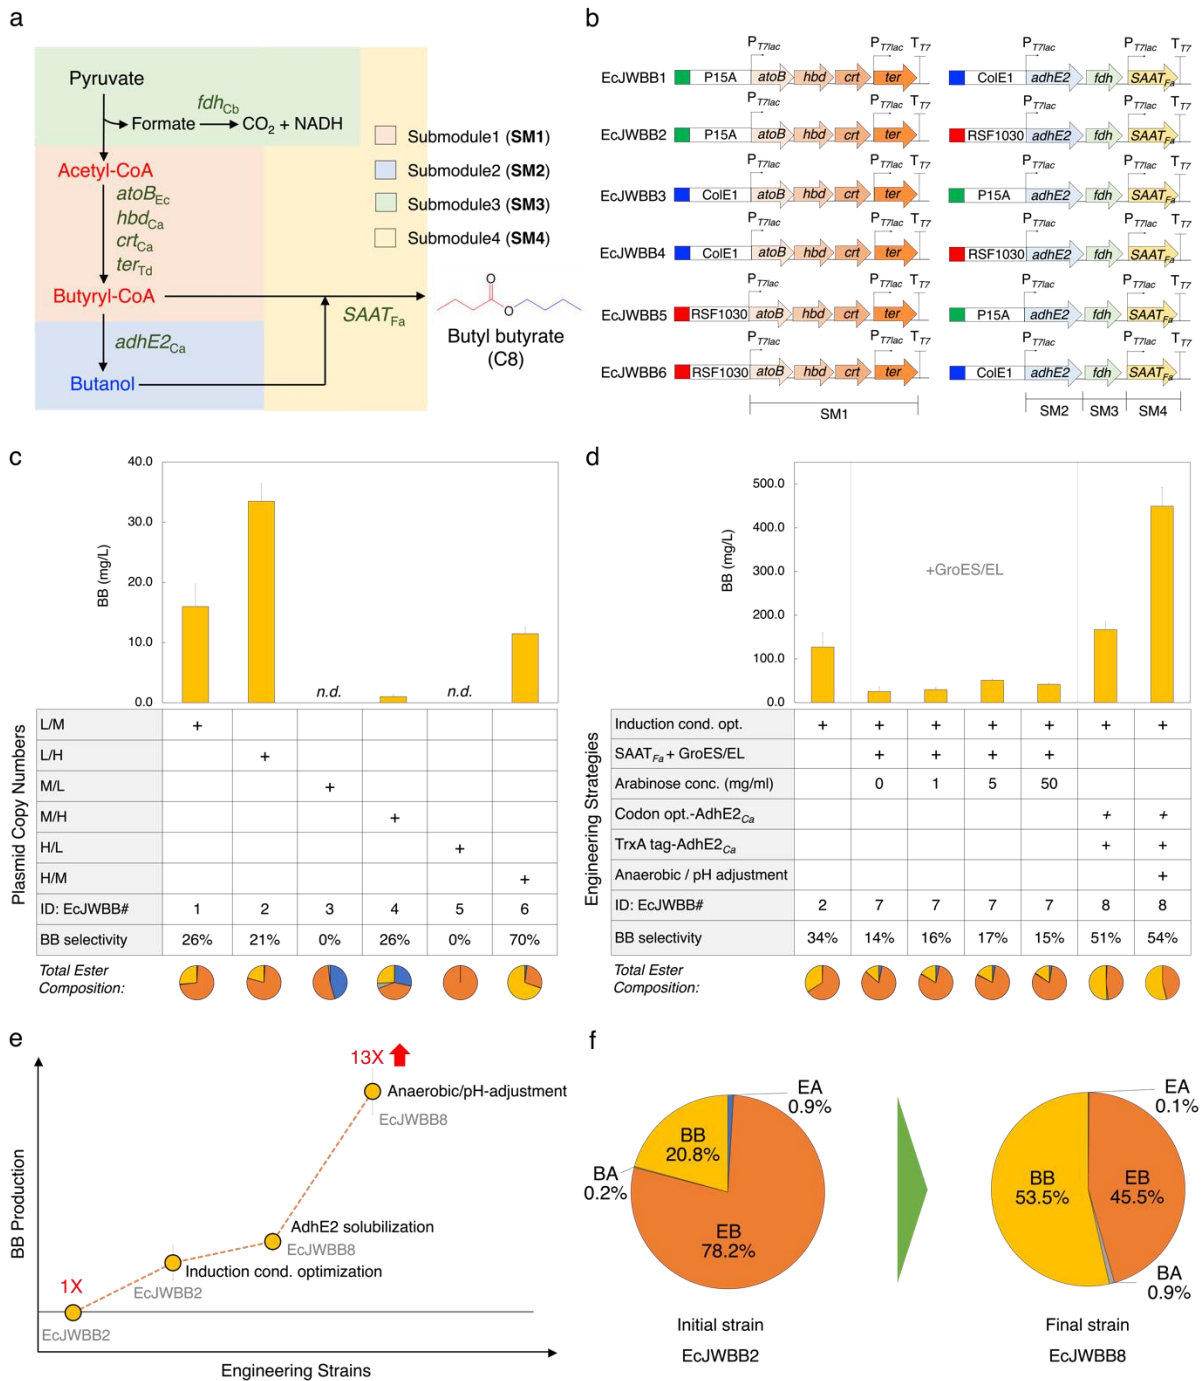

723

724

725



726 **Figure 5**

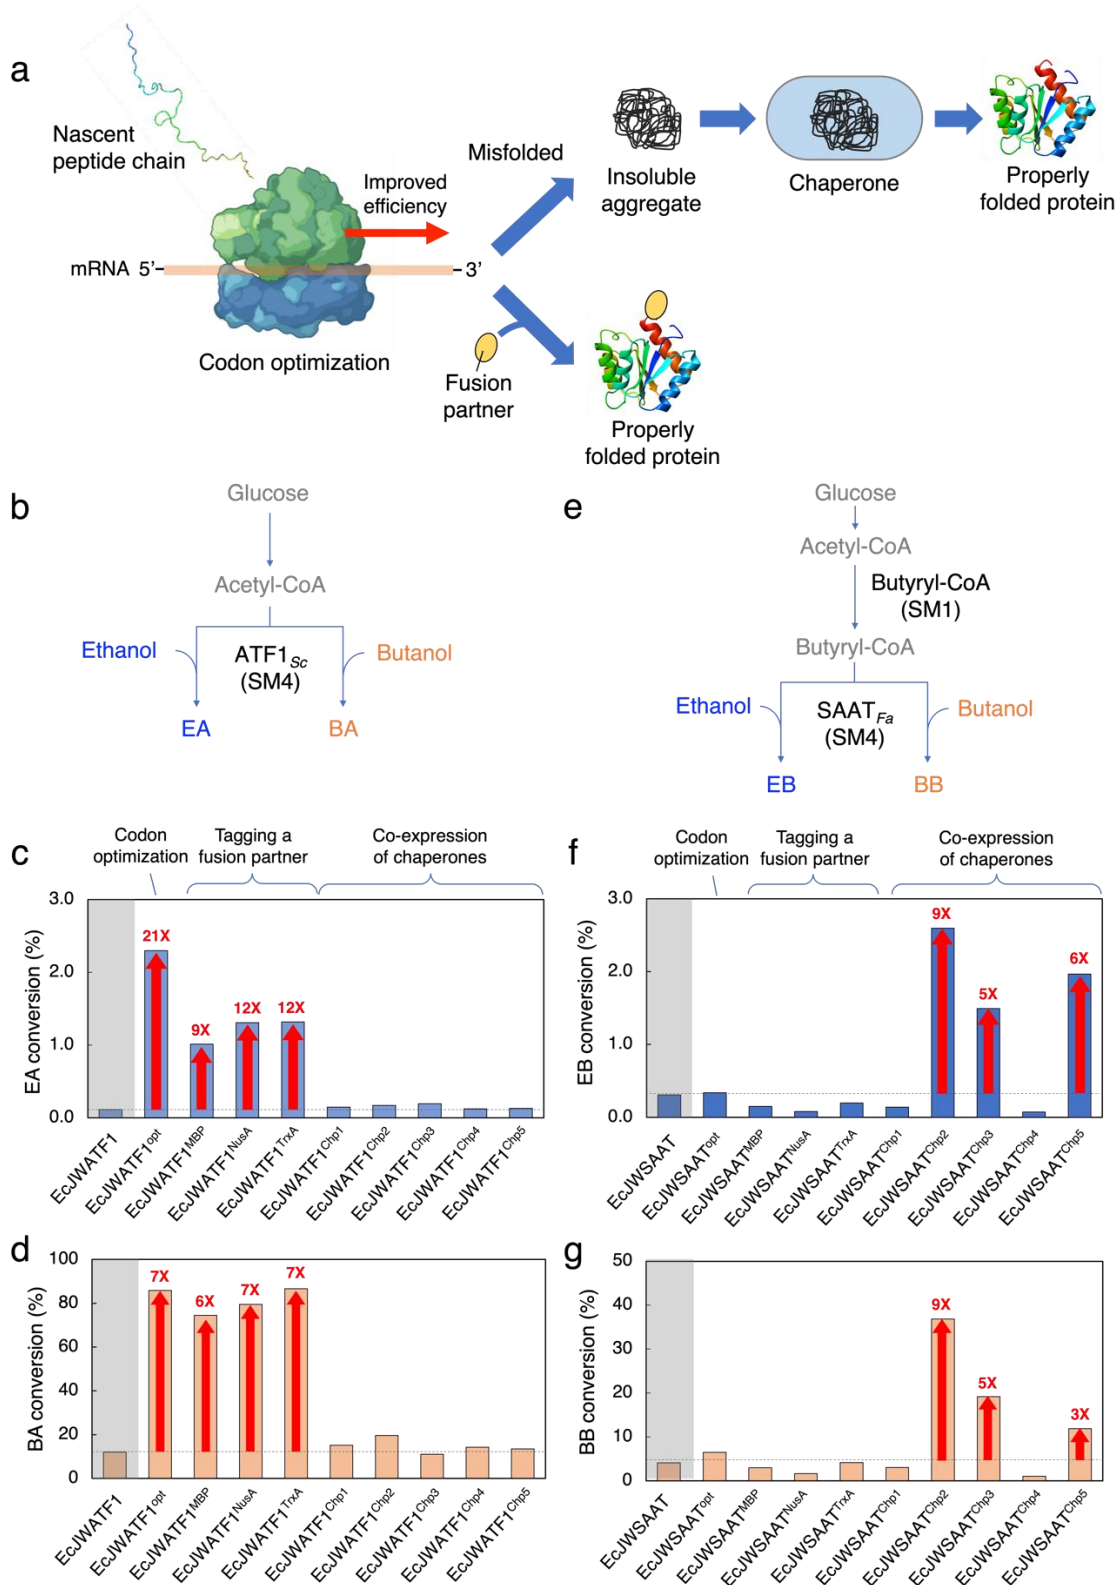

727
